# Supplementary material
Source: PubMed Central journal article supplement (PMC4859785)

## SUPPORTING INFORMATION

### ***E*- or *Z*-Selective synthesis of 4-fluorovinyl-1,2,3-triazoles with fluorinated *second-generation* Julia-Kocienski reagents**

Rakesh Kumar,<sup>a</sup> Govindra Singh,<sup>a</sup> Louis J. Todaro,<sup>b</sup> Lijia Yang,<sup>a</sup> and Barbara Zajc<sup>\*a</sup>

#### TABLE OF CONTENTS

| Information                                                                                                                                 | Page |
|---------------------------------------------------------------------------------------------------------------------------------------------|------|
| <sup>1</sup> H NMR of 2-[1-fluoro-3-(trimethylsilyl)prop-2-ynylsulfonyl]benzo[ <i>d</i> ]thiazole ( <b>1</b> )                              | 3    |
| <sup>13</sup> C NMR of 2-[1-fluoro-3-(trimethylsilyl)prop-2-ynylsulfonyl]benzo[ <i>d</i> ]thiazole ( <b>1</b> )                             | 4    |
| <sup>1</sup> H NMR of 2-{[fluoro(1-phenyl-1 <i>H</i> -1,2,3-triazol-4-yl)methyl]sulfonyl}benzo[ <i>d</i> ]thiazole ( <b>2</b> )             | 5    |
| <sup>13</sup> C NMR of 2-{[fluoro(1-phenyl-1 <i>H</i> -1,2,3-triazol-4-yl)methyl]sulfonyl}benzo[ <i>d</i> ]thiazole ( <b>2</b> )            | 6    |
| <sup>1</sup> H NMR of 2-{[fluoro(1-(naphthalen-2-yl)-1 <i>H</i> -1,2,3-triazol-4-yl)methyl]sulfonyl}benzo[ <i>d</i> ]thiazole ( <b>3</b> )  | 7    |
| <sup>13</sup> C NMR of 2-{[fluoro(1-(naphthalen-2-yl)-1 <i>H</i> -1,2,3-triazol-4-yl)methyl]sulfonyl}benzo[ <i>d</i> ]thiazole ( <b>3</b> ) | 8    |
| <sup>1</sup> H NMR of 2-{fluoro[1-(4-methoxyphenyl)-1 <i>H</i> -1,2,3-triazol-4-yl]methylsulfonyl}benzo[ <i>d</i> ]thiazole ( <b>4</b> )    | 9    |
| <sup>13</sup> C NMR of 2-{fluoro[1-(4-methoxyphenyl)-1 <i>H</i> -1,2,3-triazol-4-yl]methylsulfonyl}benzo[ <i>d</i> ]thiazole ( <b>4</b> )   | 10   |
| <sup>1</sup> H NMR of 2-{fluoro[1-(4-phenoxyphenyl)-1 <i>H</i> -1,2,3-triazol-4-yl]methyl]sulfonyl}benzo[ <i>d</i> ]thiazole ( <b>5</b> )   | 11   |
| <sup>13</sup> C NMR of 2-{fluoro[1-(4-phenoxyphenyl)-1 <i>H</i> -1,2,3-triazol-4-yl]methyl]sulfonyl}benzo[ <i>d</i> ]thiazole ( <b>5</b> )  | 12   |
| <sup>1</sup> H NMR of 2-{[fluoro(1-(4-nitrophenyl)-1 <i>H</i> -1,2,3-triazol-4-yl)methyl]sulfonyl}benzo[ <i>d</i> ]thiazole ( <b>6</b> )    | 13   |
| <sup>13</sup> C NMR of 2-{[fluoro(1-(4-nitrophenyl)-1 <i>H</i> -1,2,3-triazol-4-yl)methyl]sulfonyl}benzo[ <i>d</i> ]thiazole ( <b>6</b> )   | 14   |
| <sup>1</sup> H NMR of 2-[[1-(adamantan-1-yl)-1 <i>H</i> -1,2,3-triazol-4-yl]fluoromethyl]sulfonyl}benzo[ <i>d</i> ]thiazole ( <b>7</b> )    | 15   |
| <sup>13</sup> C NMR of 2-[[1-(adamantan-1-yl)-1 <i>H</i> -1,2,3-triazol-4-yl]fluoromethyl]sulfonyl}benzo[ <i>d</i> ]thiazole ( <b>7</b> )   | 16   |
| <sup>1</sup> H NMR of 2-[(1-decyl-1 <i>H</i> -1,2,3-triazol-4-yl)fluoromethylsulfonyl]benzo[ <i>d</i> ]thiazole ( <b>8</b> )                | 17   |
| <sup>13</sup> C NMR of 2-[(1-decyl-1 <i>H</i> -1,2,3-triazol-4-yl)fluoromethylsulfonyl]benzo[ <i>d</i> ]thiazole ( <b>8</b> )               | 18   |
| <sup>1</sup> H NMR of 2-{fluoro[1-(3-phenylpropyl)-1 <i>H</i> -1,2,3-triazol-4-yl]methylsulfonyl}benzo[ <i>d</i> ]thiazole ( <b>9</b> )     | 19   |
| <sup>13</sup> C NMR of 2-{fluoro[1-(3-phenylpropyl)-1 <i>H</i> -1,2,3-triazol-4-yl]methylsulfonyl}benzo[ <i>d</i> ]thiazole ( <b>9</b> )    | 20   |
| <sup>1</sup> H NMR of 2-{[fluoro(1-(ferrocenyl)-1 <i>H</i> -1,2,3-triazol-4-yl)methyl]sulfonyl}benzo[ <i>d</i> ]thiazole ( <b>10</b> )      | 21   |
| <sup>13</sup> C NMR of 2-{[fluoro(1-(ferrocenyl)-1 <i>H</i> -1,2,3-triazol-4-yl)methyl]sulfonyl}benzo[ <i>d</i> ]thiazole ( <b>10</b> )     | 22   |
| <sup>1</sup> H NMR of <i>E/Z</i> - <b>11</b> by method B                                                                                    | 23   |
| <sup>1</sup> H NMR of <i>E/Z</i> <b>12</b> by method A                                                                                      | 24   |
| <sup>1</sup> H NMR of <i>E/Z</i> - <b>13</b> by method A                                                                                    | 25   |

|                                                            |    |
|------------------------------------------------------------|----|
| <sup>1</sup> H NMR of <i>E/Z</i> - <b>14</b> by method A   | 26 |
| <sup>1</sup> H NMR of <i>E/Z</i> - <b>15</b> by method B   | 27 |
| <sup>1</sup> H NMR of <i>E/Z</i> - <b>16</b> by method A   | 28 |
| <sup>1</sup> H NMR of <i>E/Z</i> - <b>17</b> by method A   | 29 |
| <sup>1</sup> H NMR of <i>E/Z</i> - <b>18</b> by method A   | 30 |
| <sup>1</sup> H NMR of <i>E/Z</i> - <b>19</b> by method B   | 31 |
| <sup>1</sup> H NMR of <i>E/Z</i> - <b>20</b> by method B   | 32 |
| <sup>1</sup> H NMR of <i>E/Z</i> - <b>21</b> by method B   | 33 |
| <sup>1</sup> H NMR of <i>E/Z</i> - <b>22</b> by method B   | 34 |
| <sup>1</sup> H NMR of <i>E/Z</i> - <b>23</b> by method B   | 35 |
| <sup>1</sup> H NMR of <i>E/Z</i> - <b>24</b> by method B   | 36 |
| <sup>1</sup> H NMR of <i>E/Z</i> - <b>25</b> by method B   | 37 |
| <sup>1</sup> H NMR of <b>26</b>                            | 38 |
| <sup>13</sup> C NMR of <b>26</b>                           | 39 |
| <sup>1</sup> H NMR of <b>27</b>                            | 40 |
| <sup>13</sup> C NMR of <b>27</b>                           | 41 |
| <sup>1</sup> H NMR of <b>28</b> : Major isomer             | 42 |
| <sup>13</sup> C NMR of <b>28</b> : Major isomer            | 43 |
| <sup>1</sup> H NMR of <b>28</b> : Minor isomer             | 44 |
| <sup>13</sup> C NMR of <b>28</b> : Minor isomer            | 45 |
| <sup>1</sup> H NMR of <i>Z</i> - <b>29</b> : Major isomer  | 46 |
| <sup>13</sup> C NMR of <i>Z</i> - <b>29</b> : Major isomer | 47 |
| <sup>1</sup> H NMR of <i>E</i> - <b>29</b> : Minor isomer  | 48 |
| <sup>13</sup> C NMR of <i>E</i> - <b>29</b> : Minor isomer | 49 |
| <sup>1</sup> H NMR of <b>30</b>                            | 50 |
| <sup>13</sup> C NMR of <b>30</b>                           | 51 |

---

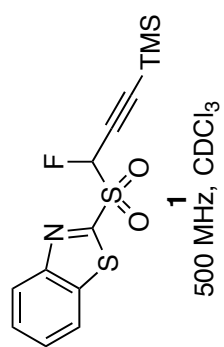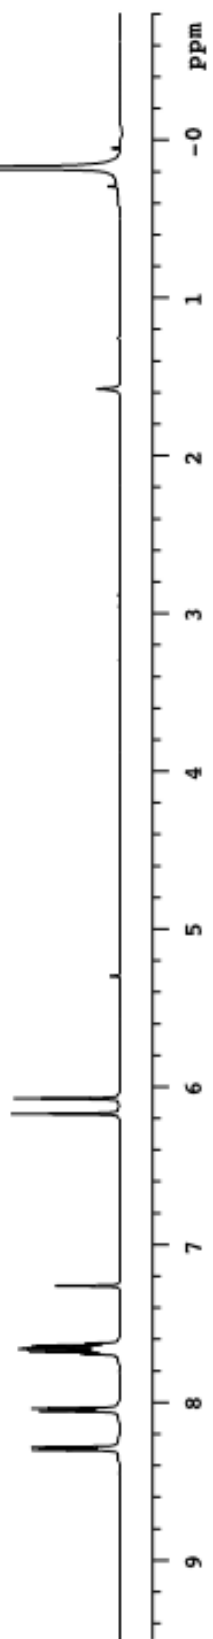

1222-RK-02-144-13C

Pulse Sequence: s2pul

Solvent: CDCl<sub>3</sub>  
Temp. 25.0 C / 298.1 K  
Operator: Barbara  
File: 1222-RK-02-144-13C  
INOVA-500 "riga"

Relax. delay 4.000 sec  
Pulse 52.1 degrees  
Acq. time 1.300 sec  
Width 29996.3 Hz  
100 repetitions  
OBSERVE C13, 125.6674411 MHz  
DECOUPLE H1, 499.7732084 MHz  
Power 42 db  
on during acquisition  
WALTZ-16 modulated  
DATA PROCESSING  
Line broadening 1.0 Hz  
FT size 131072  
Total time 9 min, 12 sec

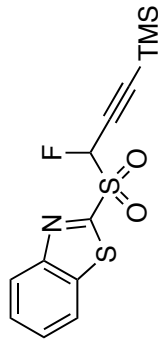

1  
125 MHz, CDCl<sub>3</sub>

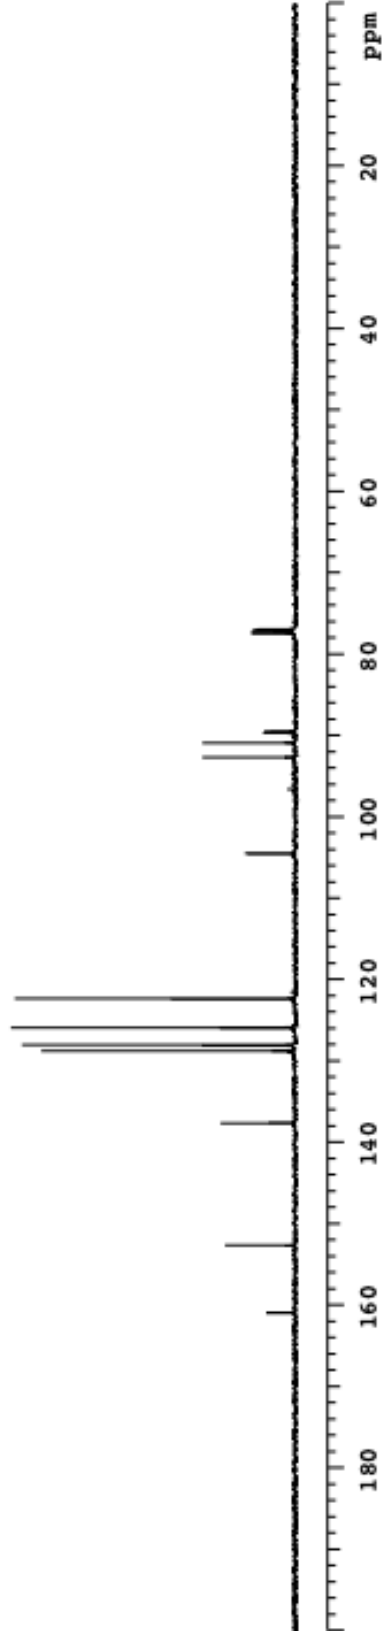

1222-RK-04-259-pure

Archive directory: /export/home/mkl/vnmrSYS/data

Sample directory: auto\_13Dec2004

Pulse sequence: s2pul

Solvent: cdcl3

Temp. 25.0 C / 298.1 K

Operator: Barbara

File: 1222-RK-04-259-pure

INOVA-500 "riga"

Relax. delay 1.000 sec

Pulse 45.0 degrees

Acq. time 1.892 sec

Width 7544.3 Hz

20 repetitions

OBSERVE H1, 499.7707212 MHz

DATA PROCESSING

Line broadening 0.1 Hz

FT size 32768

Total time 1 min, 32 sec

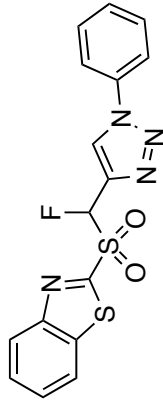

2

500 MHz, CDCl<sub>3</sub>

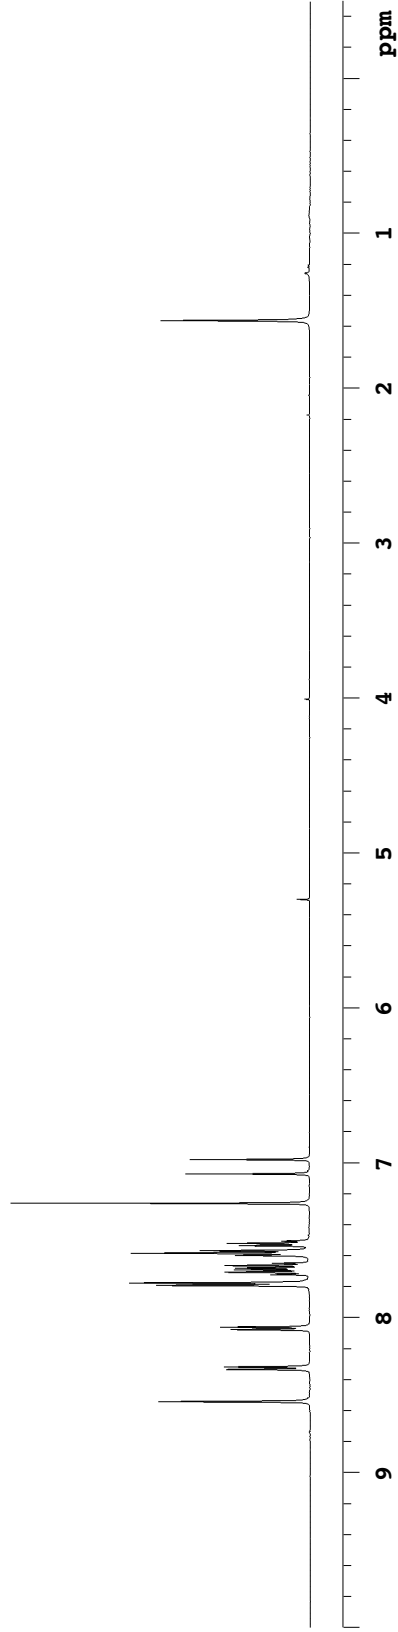

1222-RK-04-259-13C-1

Archive directory: /export/home/barbara/vnmrSYS/data

Sample directory:

Pulse sequence: s2pul

Solvent: CDCl3

Temp. 25.0 C / 298.1 K

Operator: barbara

File: 1222-RK-04-259-13C-1

INOVA-500 "riga"

Relax. delay 4.000 sec

Pulse 52.1 degrees

Acq. time 1.300 sec

Width 29996.3 Hz

1892 repetitions

OBSERVE C13, 125.6674182 MHz

DECOUPLE H1, 499.7732084 MHz

Power 42 dB

on during acquisition

WALTZ-16 modulated

DATA PROCESSING

Line broadening 1.0 Hz

FT size 131072

Total time 29 hr, 30 min, 9 sec

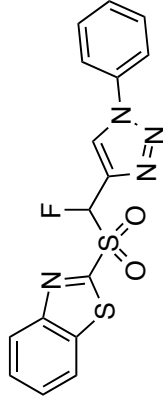

2

125 MHz, CDCl<sub>3</sub>

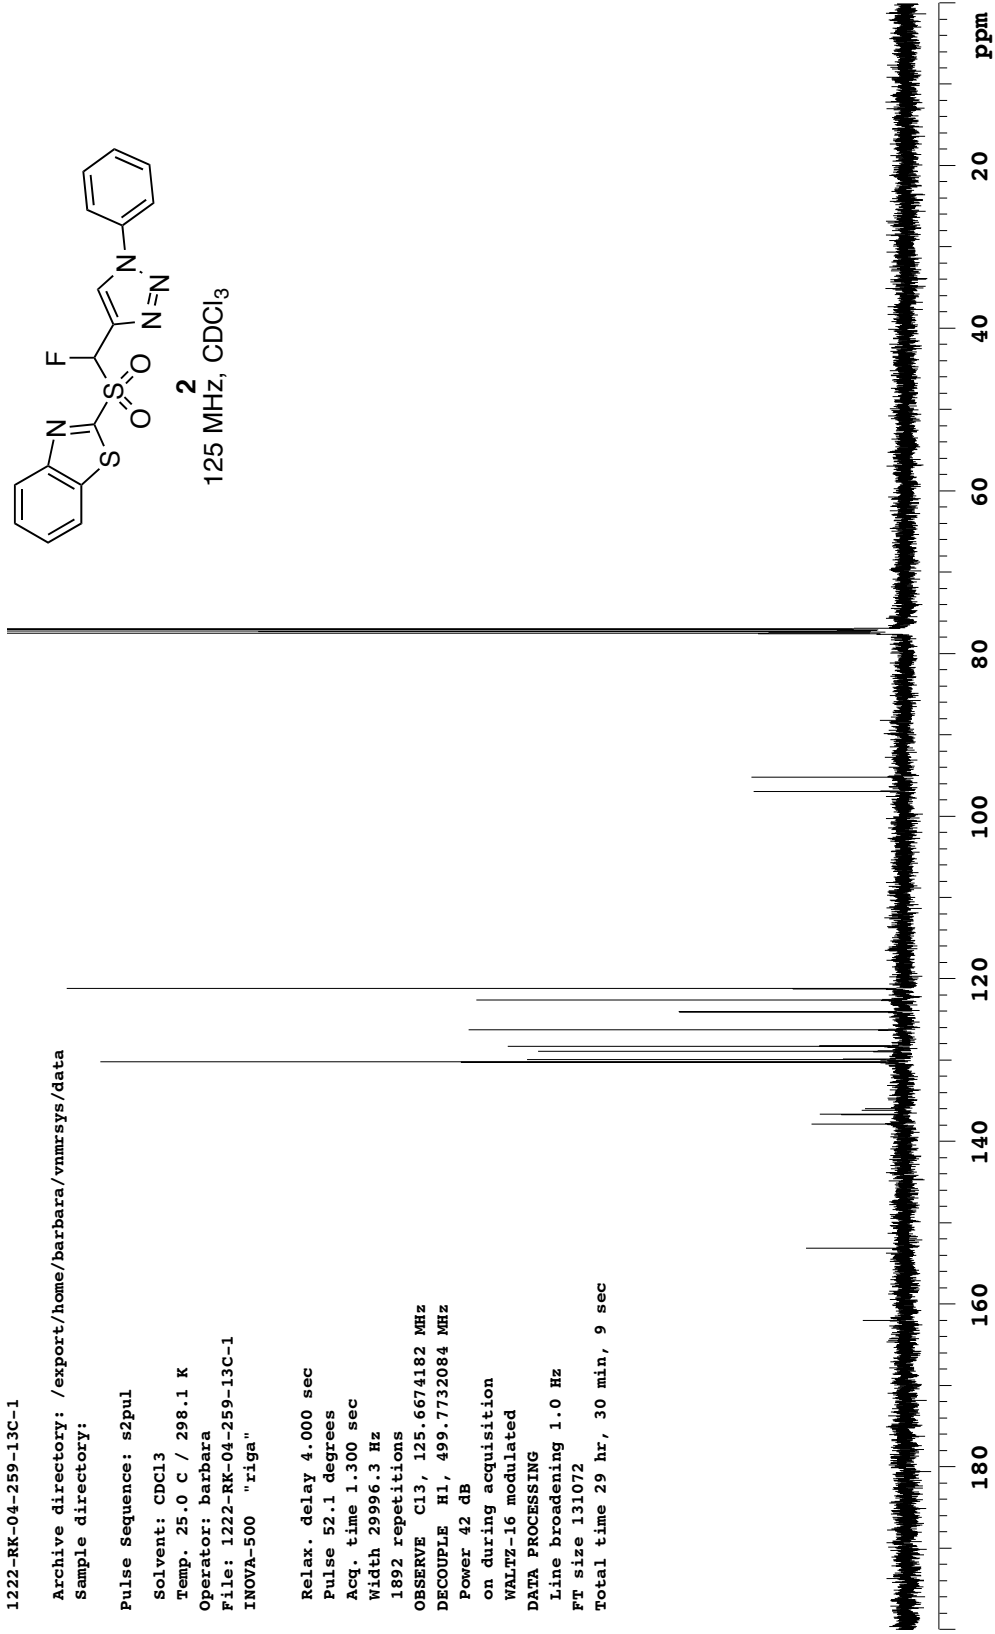

1222-RK-04-257-PURE

Archive directory: /export/home/mkl/vnmrSYS/data  
Sample directory: auto\_13Dec2004

Pulse Sequence: s2pul

Solvent: cdcl3

Temp. 25.0 C / 298.1 K

Operator: Barbara

File: 1222-RK-04-257-PURE

INOVA-500 "riga"

Relax. delay 1.000 sec

Pulse 45.0 degrees

Acq. time 1.892 sec

Width 7544.3 Hz

16 repetitions

OBSERVE H1, 499.7707207 MHz

DATA PROCESSING

Line broadening 0.1 Hz

FT size 32768

Total time 1 min, 32 sec

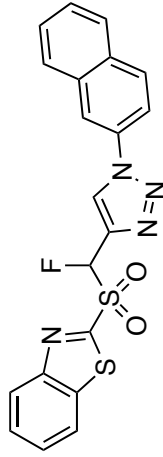

3

500 MHz, CDCl<sub>3</sub>

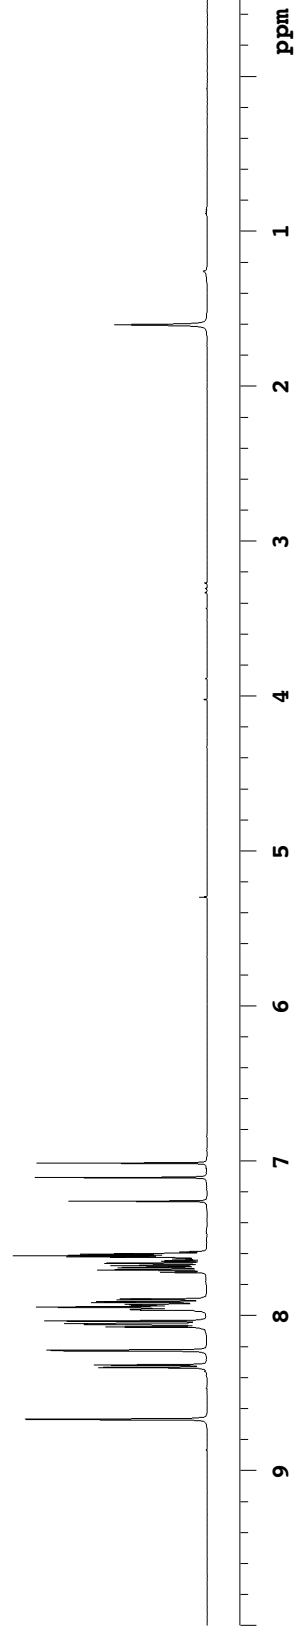

1222-RK-04-258-13C

Archive directory: /export/home/barbara/vnmrSYS/data

Sample directory:

Pulse Sequence: s2pul

Solvent: CDCl<sub>3</sub>

Temp. 25.0 C / 298.1 K

Operator: barbara

File: 1222-RK-04-257-13C

INOVA-500 "riga"

Relax. delay 4.000 sec

Pulse 52.1 degrees

Acq. time 1.300 sec

Width 29996.3 Hz

500 repetitions

OBSERVE C13, 125.6674218 MHz

DECOUPLE H1, 499.7732084 MHz

Power 42 dB

on during acquisition

WALTZ-16 modulated

DATA PROCESSING

Line broadening 4.0 Hz

FT size 131072

Total time 44 min, 35 sec

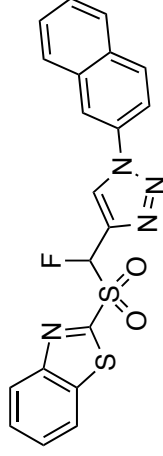

3

125 MHz, CDCl<sub>3</sub>

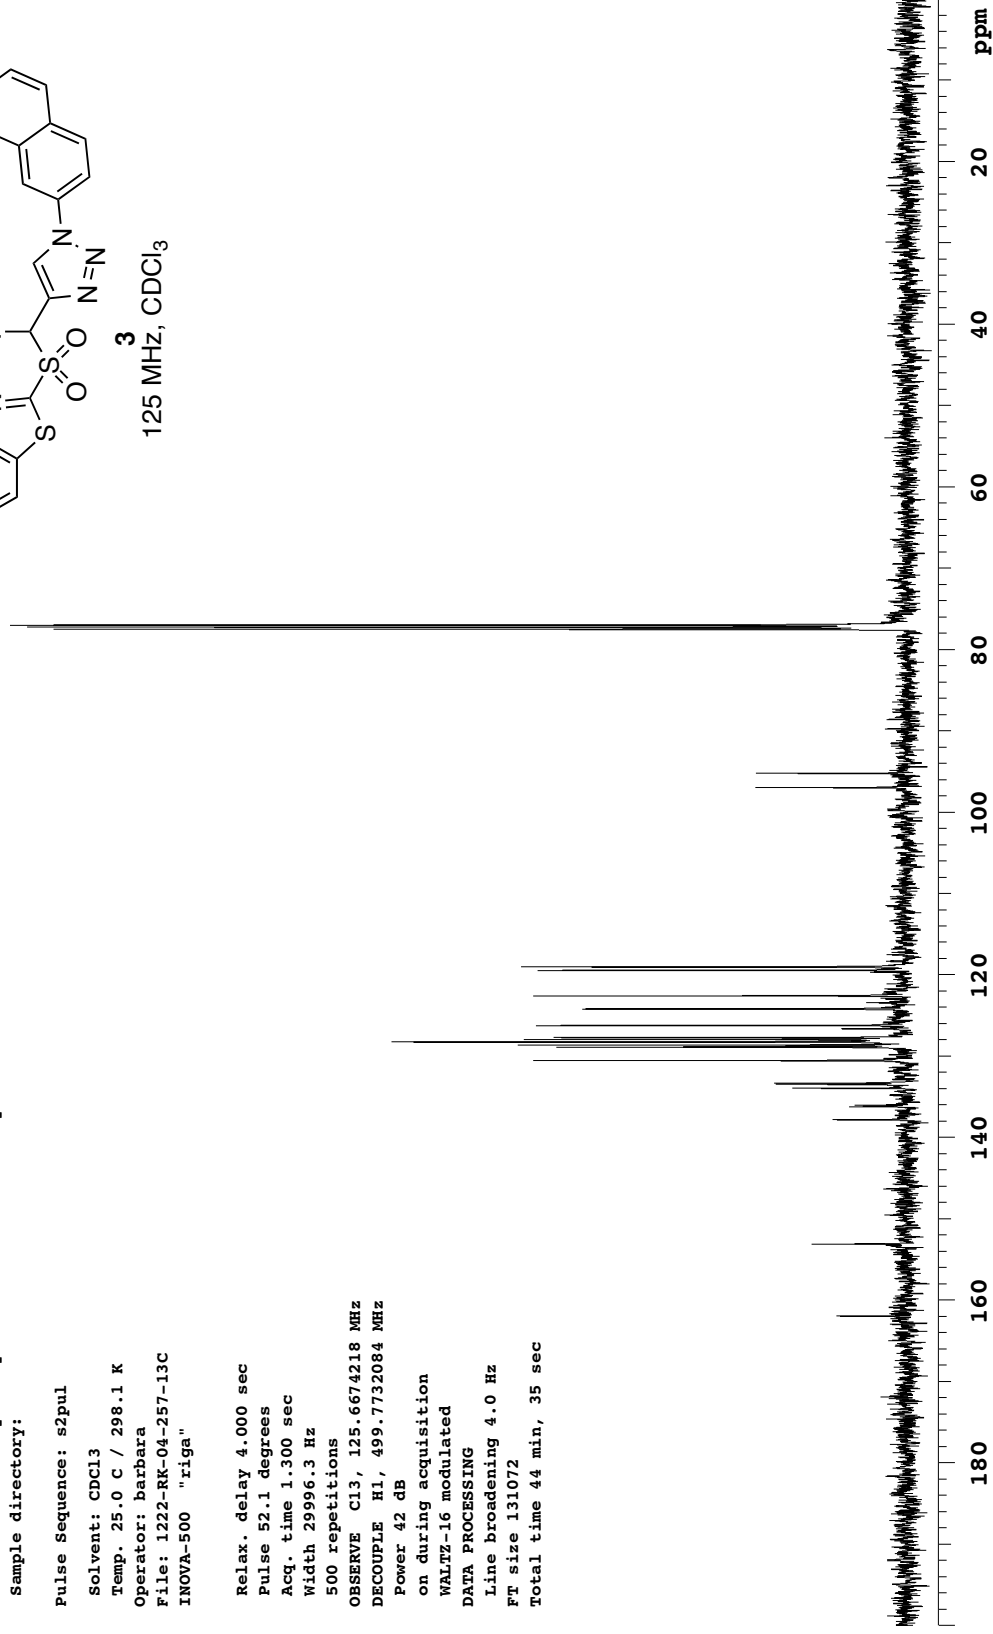



1222-RK-04-246-pure-1H

Archive directory: /export/home/mkl/vnmrsys/data  
Sample directory: auto\_13Dec2004

Pulse Sequence: s2pul

Solvent: cdcl3  
Temp. 25.0 C / 298.1 K  
Operator: barbara  
File: 1222-RK-04-246-pure-1H  
INOVA-500 "r1ga"

Relax. delay 1.000 sec  
Pulse 45.0 degrees  
Acq. time 1.892 sec  
Width 7544.3 Hz  
52 repetitions  
OBSERVE H1, 499.7707216 MHz  
DATA PROCESSING  
Line broadening 0.5 Hz  
FT size 32768  
Total time 9 min, 40 sec

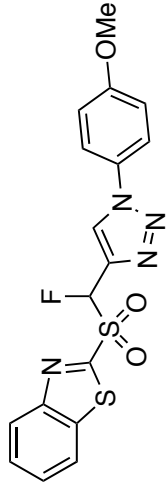

4

500 MHz, CDCl<sub>3</sub>

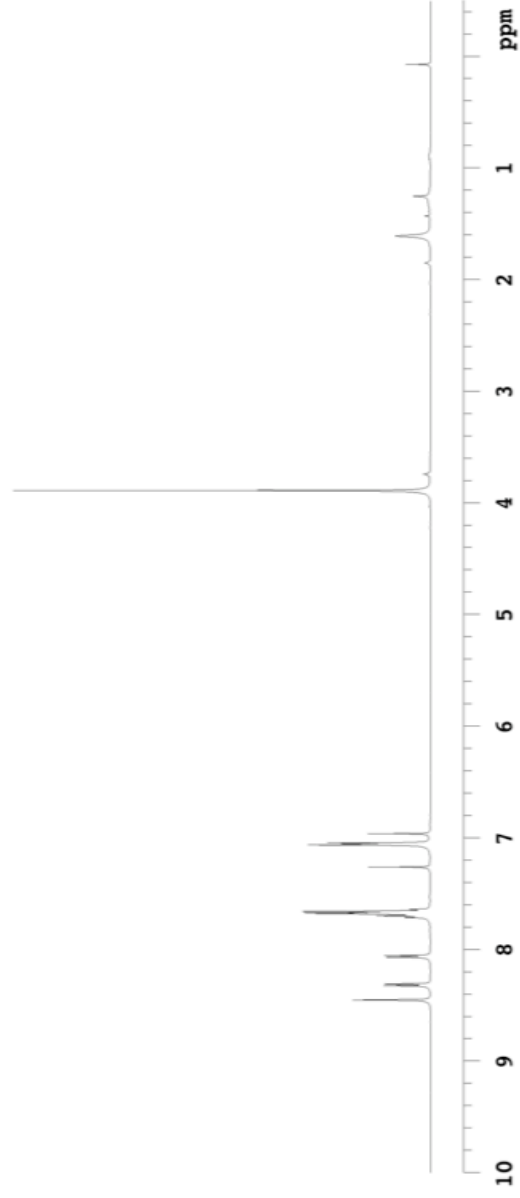

1222-RK-04-246-pure

Archive directory: /export/home/barbara/vnarsys/data  
Sample directory: 1222-RK-04-246-pure\_24Mar2008

Pulse Sequence: s2pul

Solvent: CDCl3  
Temp. 25.0 C / 298.1 K  
Operator: barbara  
File: 1222-RK-04-246-pure  
INOVA-500 "ziga"

Relax. delay 25.000 sec  
Pulse 45.0 degrees  
Acq. time 1.300 sec  
Width 31421.8 Hz  
512 repetitions  
OBSERVE C13, 125.6674148 MHz  
DECOUPLE H1, 499.7732084 MHz  
Power 38 dB  
continuously on  
WALTZ-16 modulated  
DATA PROCESSING  
Line broadening 4.0 Hz  
FT size 131072  
Total time 7 hr, 18 min, 29 sec

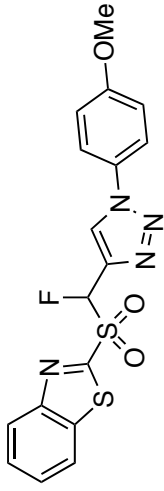

4

125 MHz, CDCl<sub>3</sub>

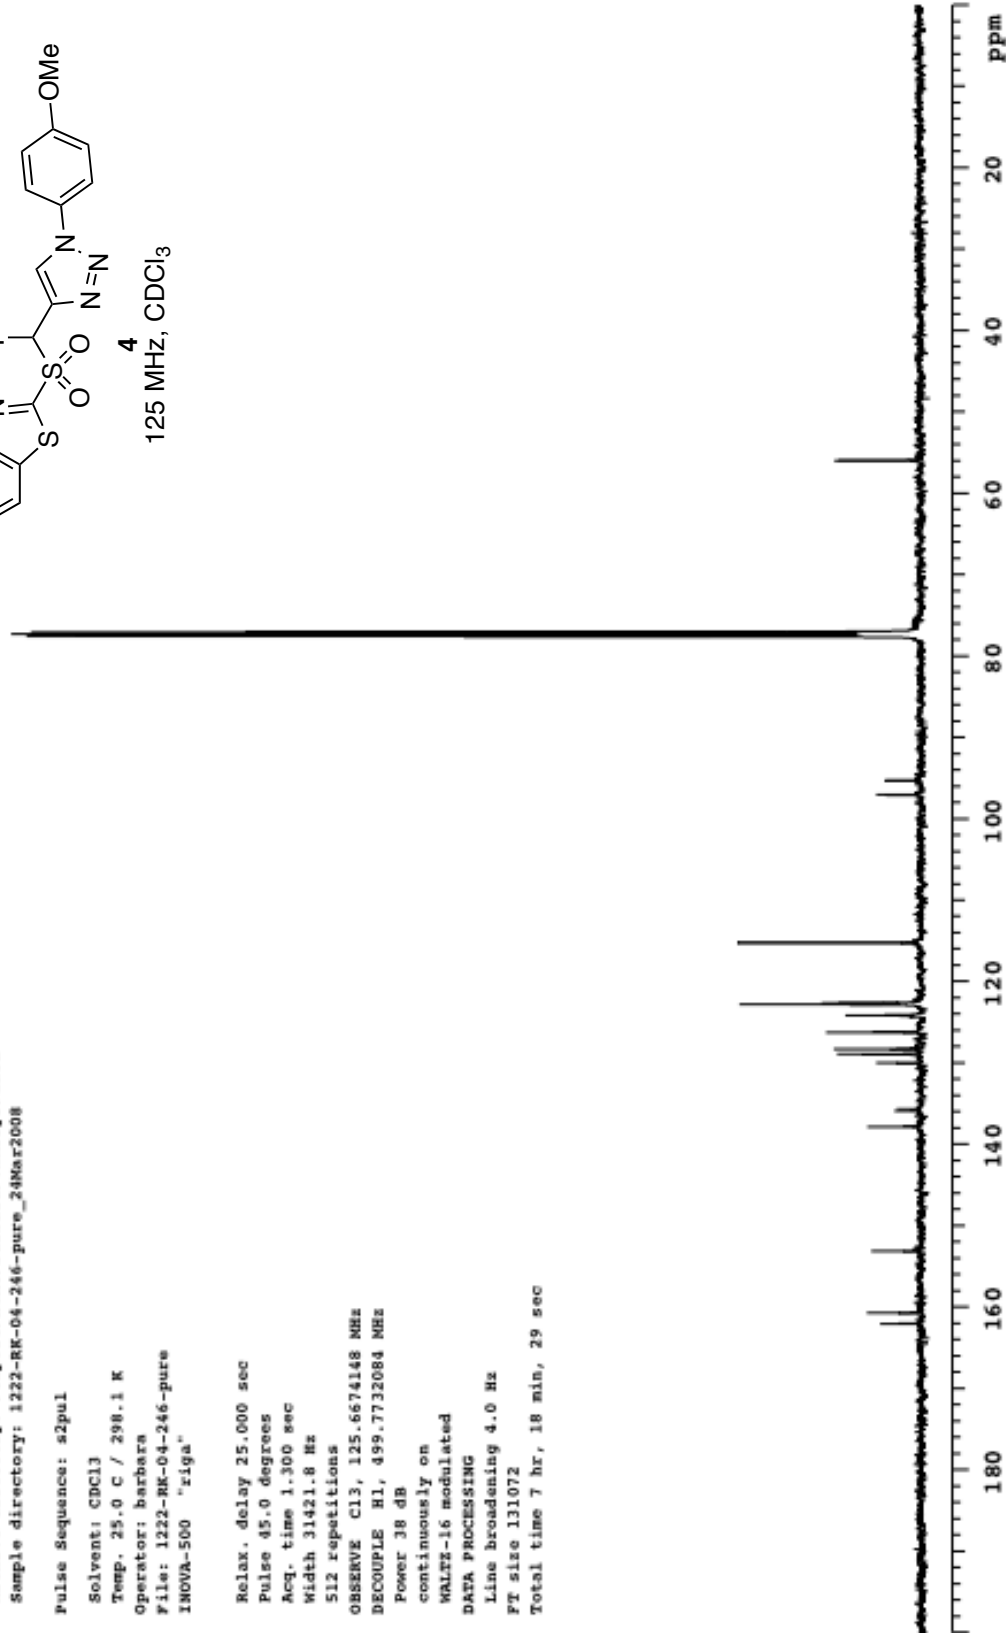

1222-RK-04-242-2ndfraction

Archive directory: /export/home/mkl/vmrsys/data

Sample directory: auto\_13Dec2004

Pulse Sequence: s2pul

Solvent: cdcl3

Temp. 25.0 C / 298.1 K

Operator: Barbara

File: 1222-RK-04-242-2ndfraction

INOVA-500 "riga"

Relax. delay 1.000 sec

Pulse 45.0 degrees

Acq. time 1.892 sec

Width 7544.3 Hz

24 repetitions

OBSERVE H1, 499.7707212 MHz

DATA PROCESSING

Line broadening 0.1 Hz

FT size 32768

Total time 1 min, 32 sec

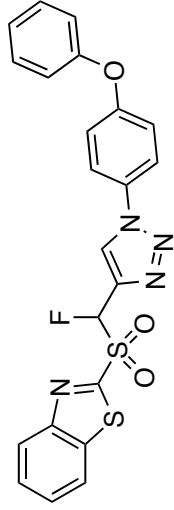

5

500 MHz, CDCl<sub>3</sub>

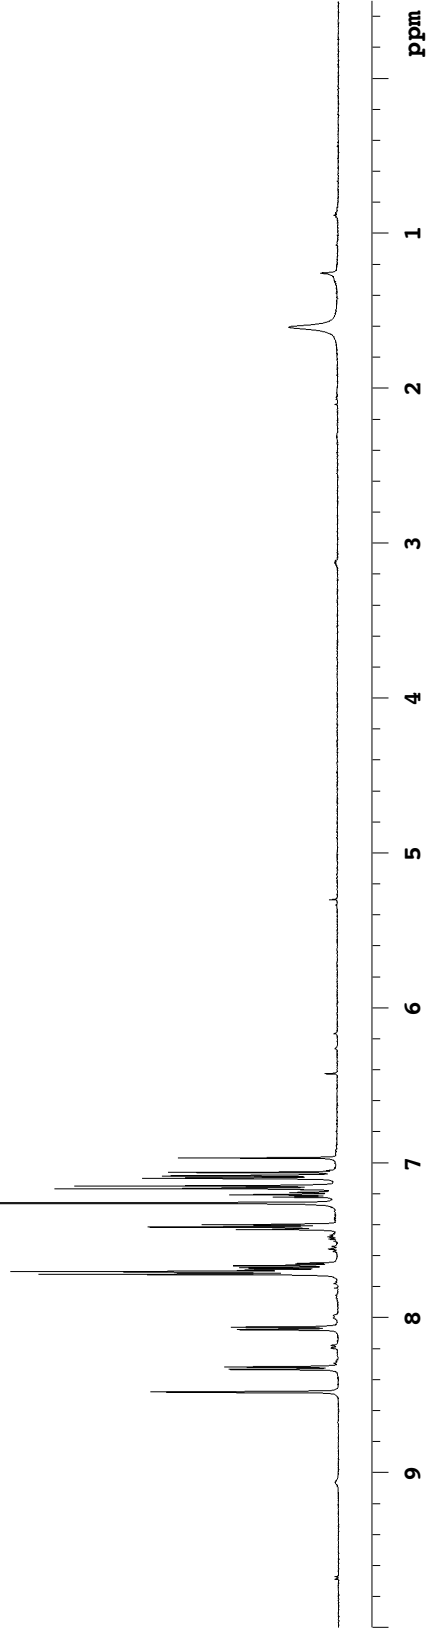

1222-RK-04-442-13C

Archive directory: /export/home/barbara/vnmrsys/data

Sample directory:

Pulse sequence: s2pul

Solvent: CDCl3

Temp. 25.0 C / 298.1 K

Operator: barbara

File: 1222-RK-04-242-13C

INOVA-500 "riga"

Relax. delay 4.000 sec

Pulse 52.1 degrees

Acq. time 1.300 sec

Width 29996.3 Hz

296 repetitions

OBSERVE C13, 125.6674218 MHz

DECOUPLE H1, 499.7732084 MHz

Power 42 dB

on during acquisition

WALTZ-16 modulated

DATA PROCESSING

Line broadening 2.0 Hz

FT size 131072

Total time 44 min, 35 sec

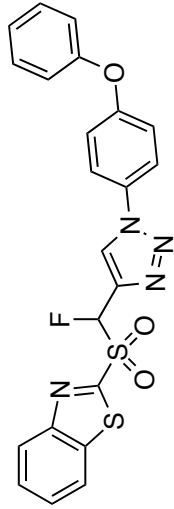

5

125 MHz, CDCl<sub>3</sub>

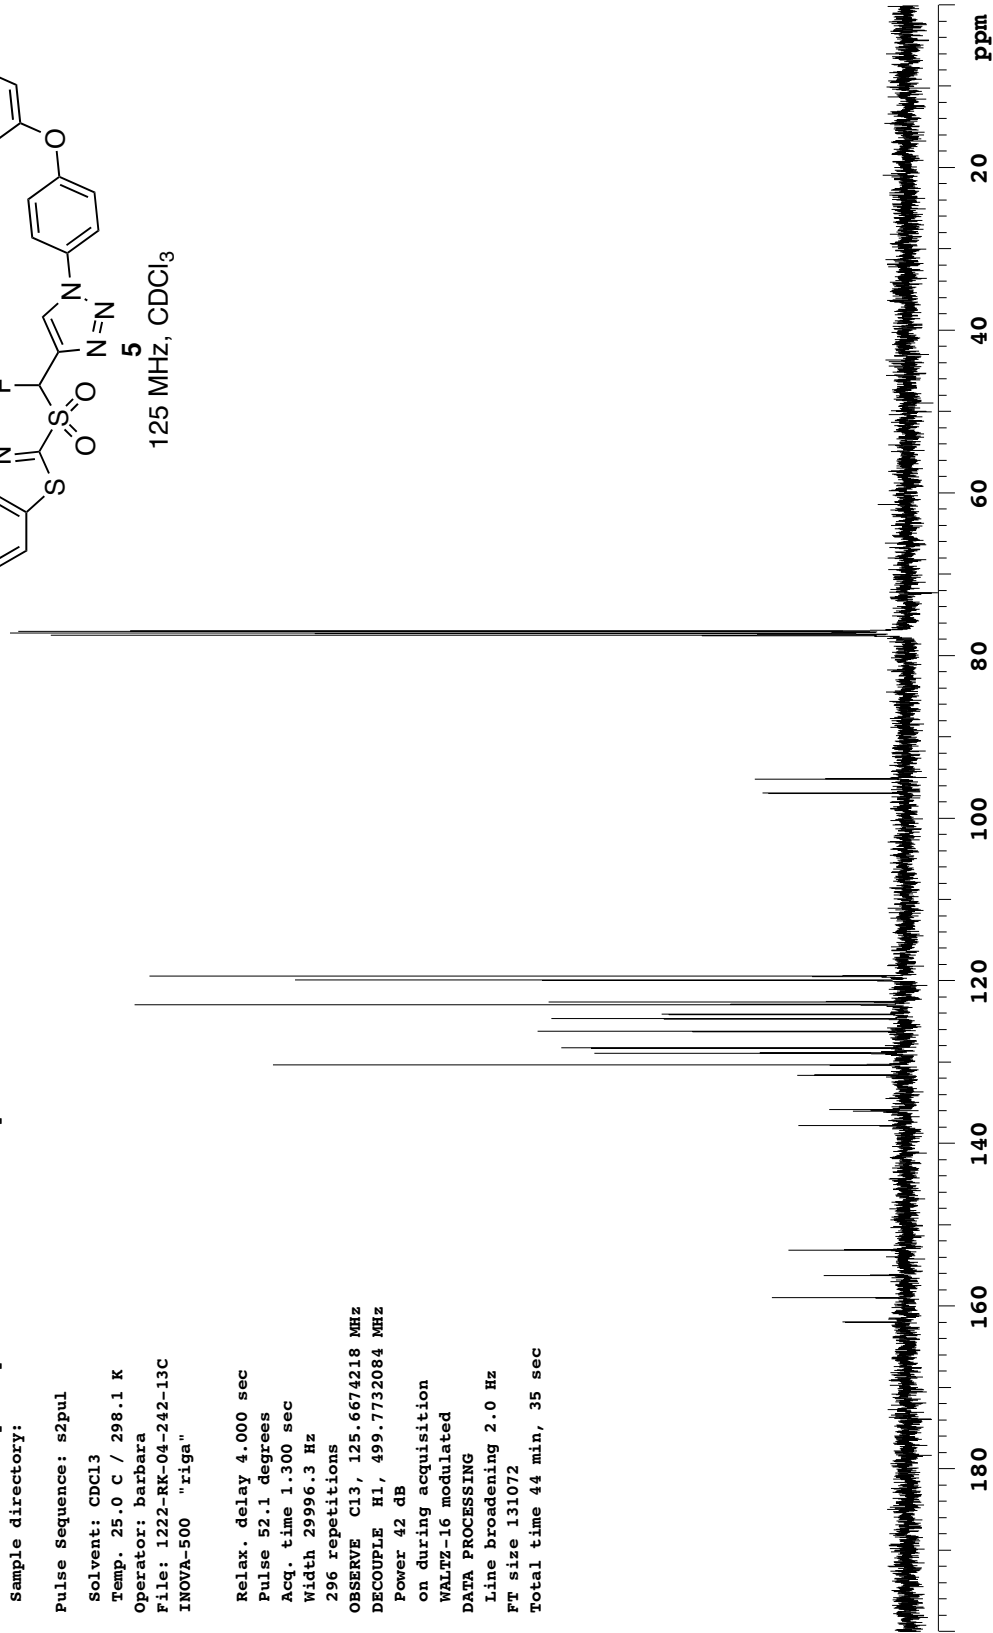

1222-RK-04-304-2-pure-DMSO

Archive directory: /export/home/mkl/vmrsys/data

Sample directory: auto\_13Dec2004

Pulse Sequence: s2pul

Solvent: dmsd

Temp. 25.0 C / 298.1 K

Operator: barbara

File: 1222-RK-04-304-2-pure-DMSO

INOVA-500 "riga"

Relax. delay 1.000 sec

Pulse 45.0 degrees

Acq. time 1.892 sec

Width 7544.3 Hz

28 repetitions

OBSERVE H1, 499.7730861 MHz

DATA PROCESSING

Line broadening 0.0 Hz

FT size 32768

Total time 1 min, 32 sec

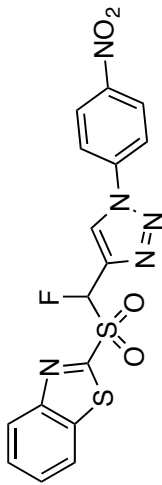

6

500 MHz, DMSO-d<sub>6</sub>

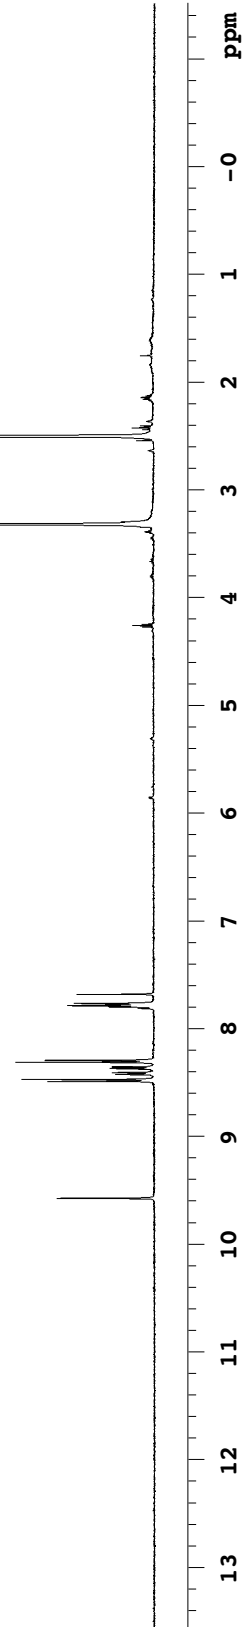

1222-RK-04-304-13C-DMSO

Archive directory: /export/home/barbara/vnmrSYS/data

Sample directory:

Pulse sequence: s2pul

Solvent: CDCl3

Temp. 25.0 C / 298.1 K

Operator: barbara

File: 1222-RK-04-304-13C-DMSO

INOVA-500 "riga"

Relax. delay 4.000 sec

Pulse 52.1 degrees

Acq. time 1.300 sec

Width 29996.3 Hz

388 repetitions

OBSERVE C13, 125.6674526 MHz

DECOUPLE H1, 499.7732084 MHz

Power 42 dB

on during acquisition

WALTZ-16 modulated

DATA PROCESSING

Line broadening 1.0 Hz

FT size 131072

Total time 53 min, 26 sec

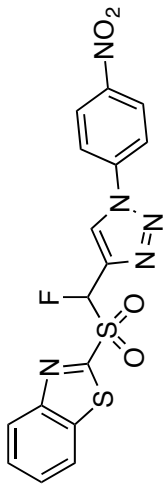

6

125 MHz, DMSO-d<sub>6</sub>

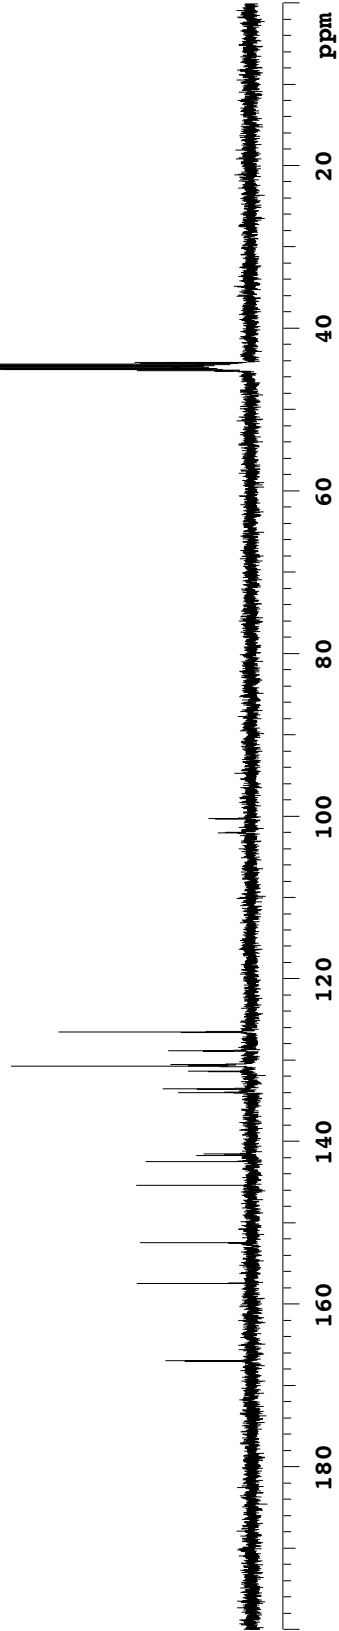

1222-RK-04-247-pure

Archive directory: /export/home/mkl/vmrSYS/data  
Sample directory: auto\_13Dec2004

Pulse Sequence: s2pul

Solvent: cdcl3

Temp. 25.0 C / 298.1 K

Operator: Barbara

File: 1222-RK-04-247-pure

INOVA-500 "riga"

Relax. delay 1.000 sec

Pulse 45.0 degrees

Acq. time 1.892 sec

Width 7544.3 Hz

20 repetitions

OBSERVE H1, 499.7707212 MHz

DATA PROCESSING

Line broadening 0.1 Hz

FT size 32768

Total time 1 min, 32 sec

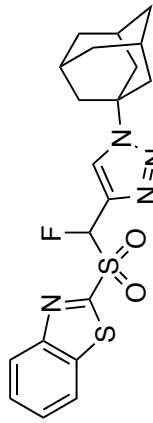

500 MHz, CDCl<sub>3</sub>

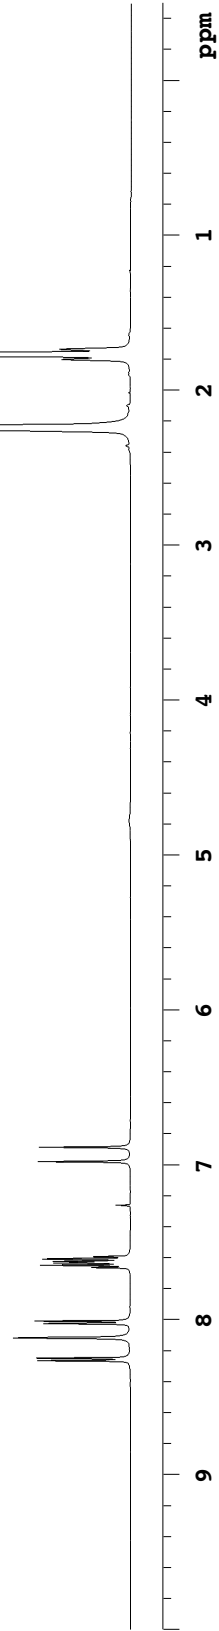

1222-RK-04-247-13C

Pulse Sequence: s2pul

Solvent: CDCl<sub>3</sub>  
Temp. 25.0 C / 298.1 K  
Operator: Barbara  
File: 1222-RK-04-247-13C  
INOVA-500 "riga"

Relax. delay 4.000 sec  
Pulse 52.1 degrees  
Acq. time 1.300 sec  
Width 29996.3 Hz  
84 repetitions  
OBSERVE C13, 125.6674273 MHz  
DECOUPLE H1, 499.7732084 MHz  
Power 42 dB  
on during acquisition  
WALTZ-16 modulated  
DATA PROCESSING  
Line broadening 3.0 Hz  
FT size 131072  
Total time 18 min, 3 sec

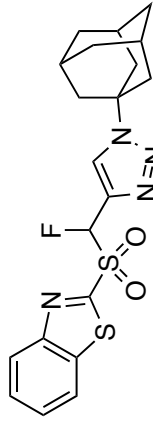

7

125 MHz, CDCl<sub>3</sub>

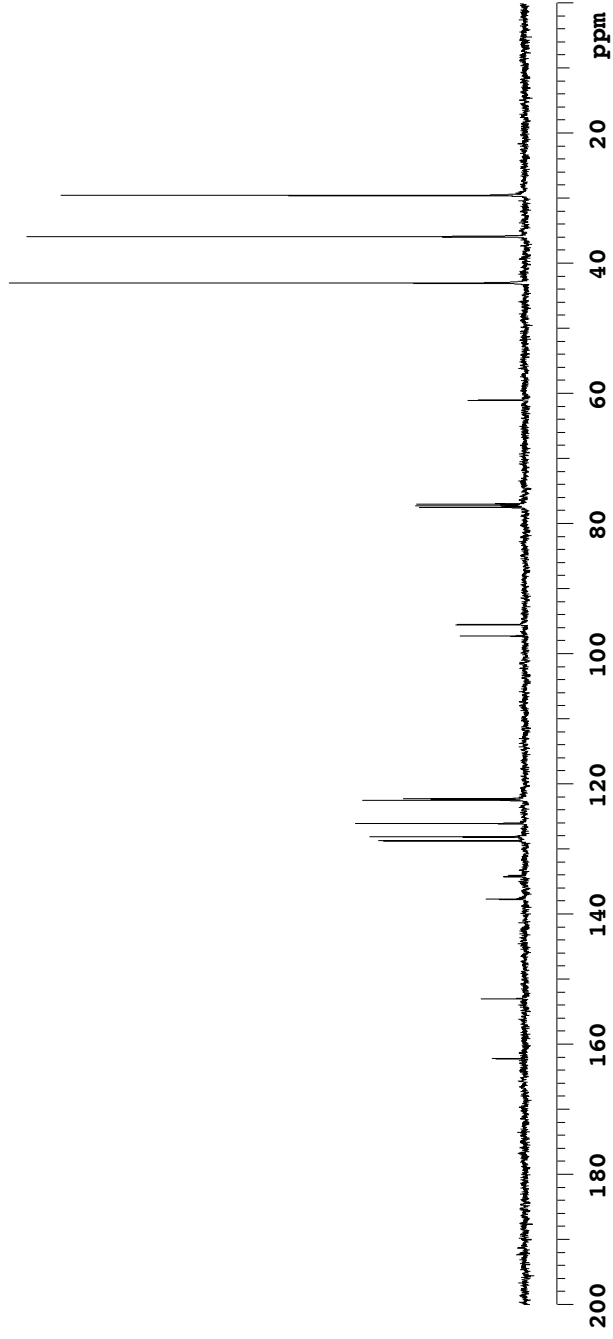



1222-RK-04-270-pure

Archive directory: /export/home/mkl/vnmrSYS/data  
Sample directory: auto\_13Dec2004

Pulse Sequence: s2pul

Solvent: cdcl3  
Temp. 25.0 C / 298.1 K  
Operator: Barbara  
File: 1222-RK-04-270-pure  
INOVA-500 "riga"

Relax. delay 1.000 sec  
Pulse 45.0 degrees  
Acq. time 1.892 sec  
Width 7544.3 Hz  
16 repetitions  
OBSERVE H1, 499.7707212 MHz  
DATA PROCESSING  
Line broadening 0.1 Hz  
FT size 32768  
Total time 1 min, 32 sec

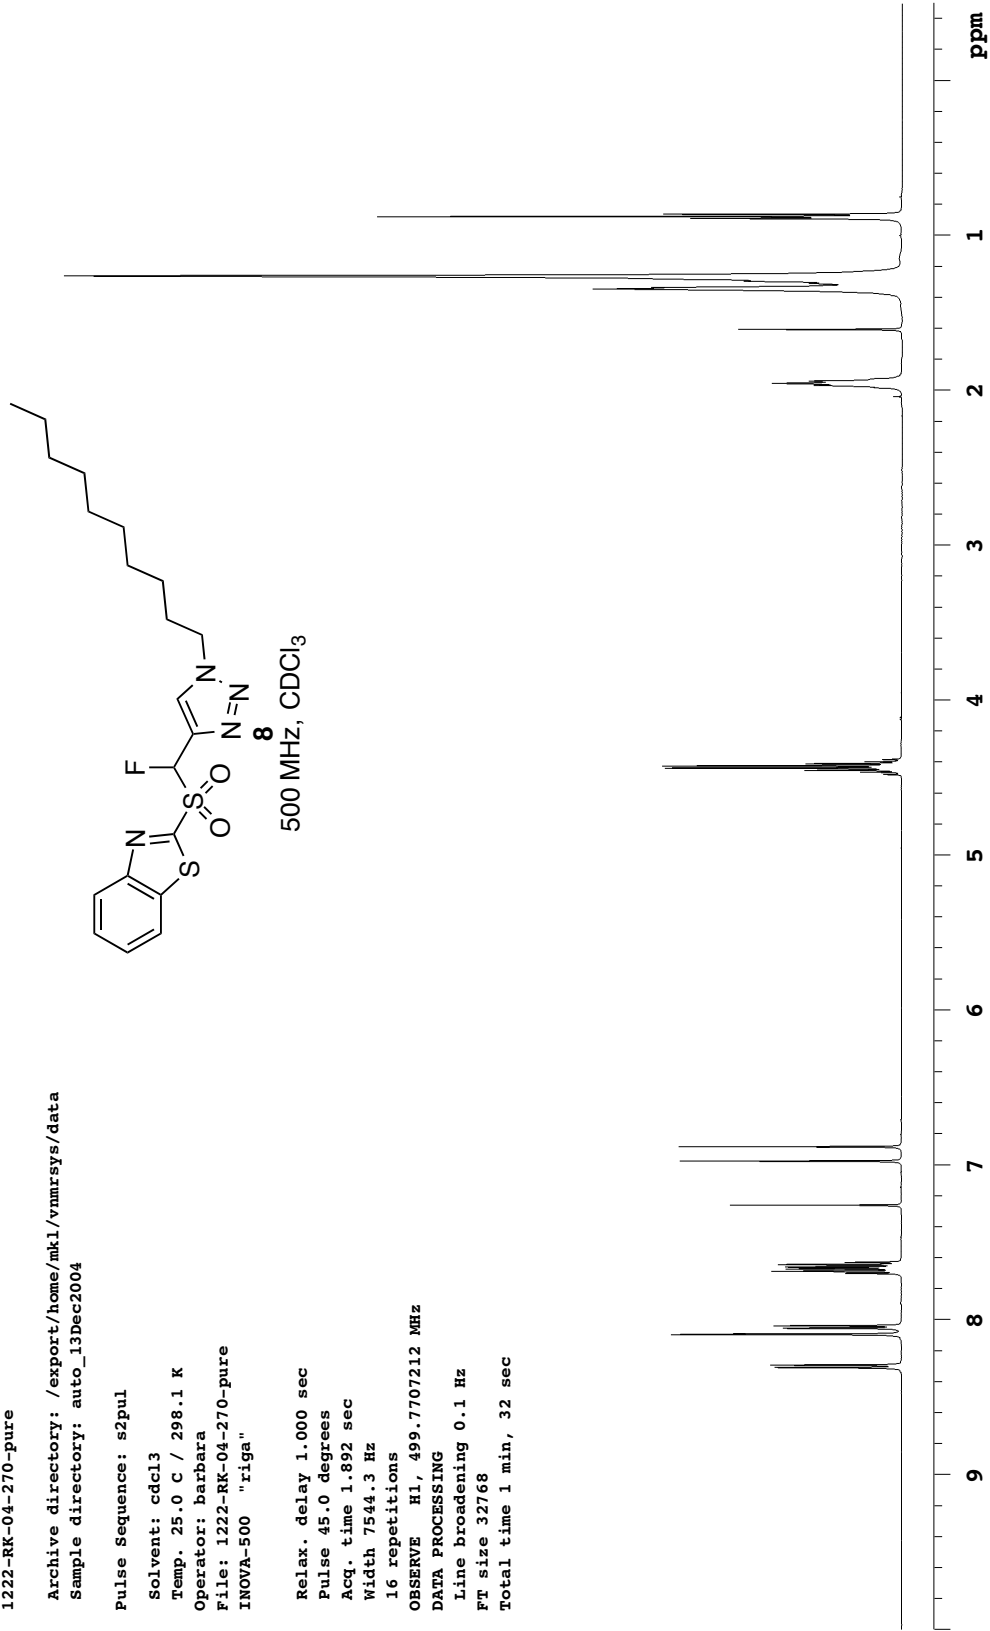

1222-RK-04-270-13C

Pulse Sequence: s2pul

Solvent: CDCl3  
Temp. 25.0 C / 298.1 K  
Operator: Barbara  
File: 1222-RK-04-270-13C  
INOVA-500 "riga"

Relax. delay 4.000 sec  
Pulse 52.1 degrees  
Acq. time 1.300 sec  
Width 29996.3 Hz  
64 repetitions  
OBSERVE C13, 125.6674571 MHz  
DECOUPLE H1, 499.7732084 MHz  
Power 42 dB  
on during acquisition  
WALTZ-16 modulated  
DATA PROCESSING  
Line broadening 3.0 Hz  
FT size 131072  
Total time 18 min, 3 sec

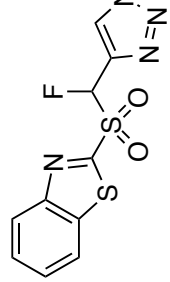

125 MHz, CDCl<sub>3</sub>

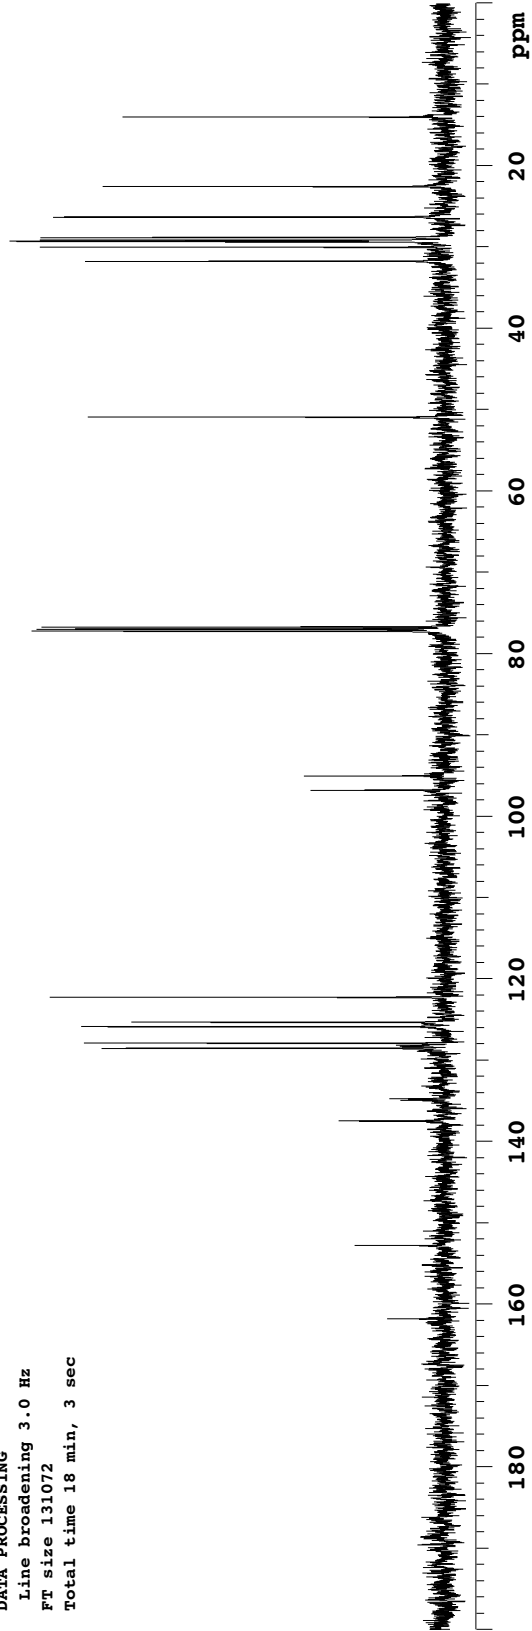

1222-RK-04-258-pure

Archive directory: /export/home/mkl/vmrssys/data

Sample directory: auto\_13Dec2004

Pulse Sequence: s2pul

Solvent: cdcl3

Temp. 25.0 C / 298.1 K

Operator: Barbara

File: 1222-RK-04-258-pure

INOVA-500 "riga"

Relax. delay 1.000 sec

Pulse 45.0 degrees

Acq. time 1.892 sec

Width 7544.3 Hz

32 repetitions

OBSERVE H1, 499.7707212 MHz

DATA PROCESSING

Line broadening 0.1 Hz

FT size 32768

Total time 1 min, 32 sec

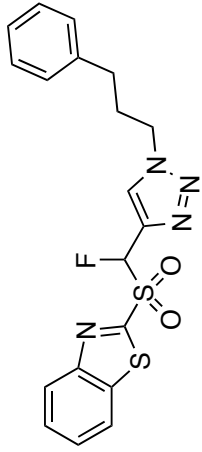

9

500 MHz, CDCl<sub>3</sub>

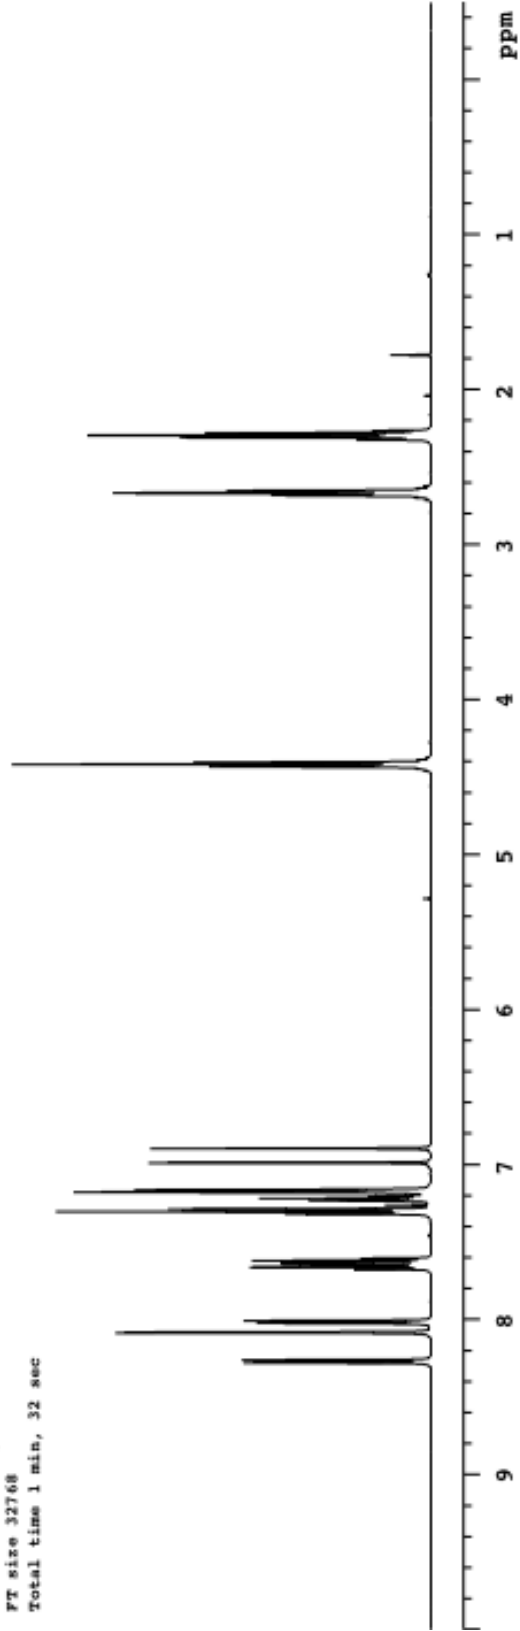

1222-RK-04-258-pure-13C

Pulse Sequence: s2pul

Solvent: CDCl<sub>3</sub>

Temp. 25.0 C / 298.1 K

Operator: Barbara

File: 1222-RK-04-258-pure-13C

INOVA-500 "riga"

Relax. delay 4.000 sec

Pulse 52.1 degrees

Acq. time 1.300 sec

Width 29996.3 Hz

52 repetitions

OBSERVE C13, 125.6674273 MHz

DECOUPLE H1, 499.7732084 MHz

Power 42 dB

on during acquisition

WALTZ-16 modulated

DATA PROCESSING

Line broadening 2.0 Hz

FT size 131072

Total time 2 hr, 57 min, 20 sec

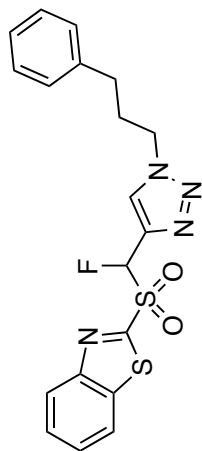

9

125 MHz, CDCl<sub>3</sub>

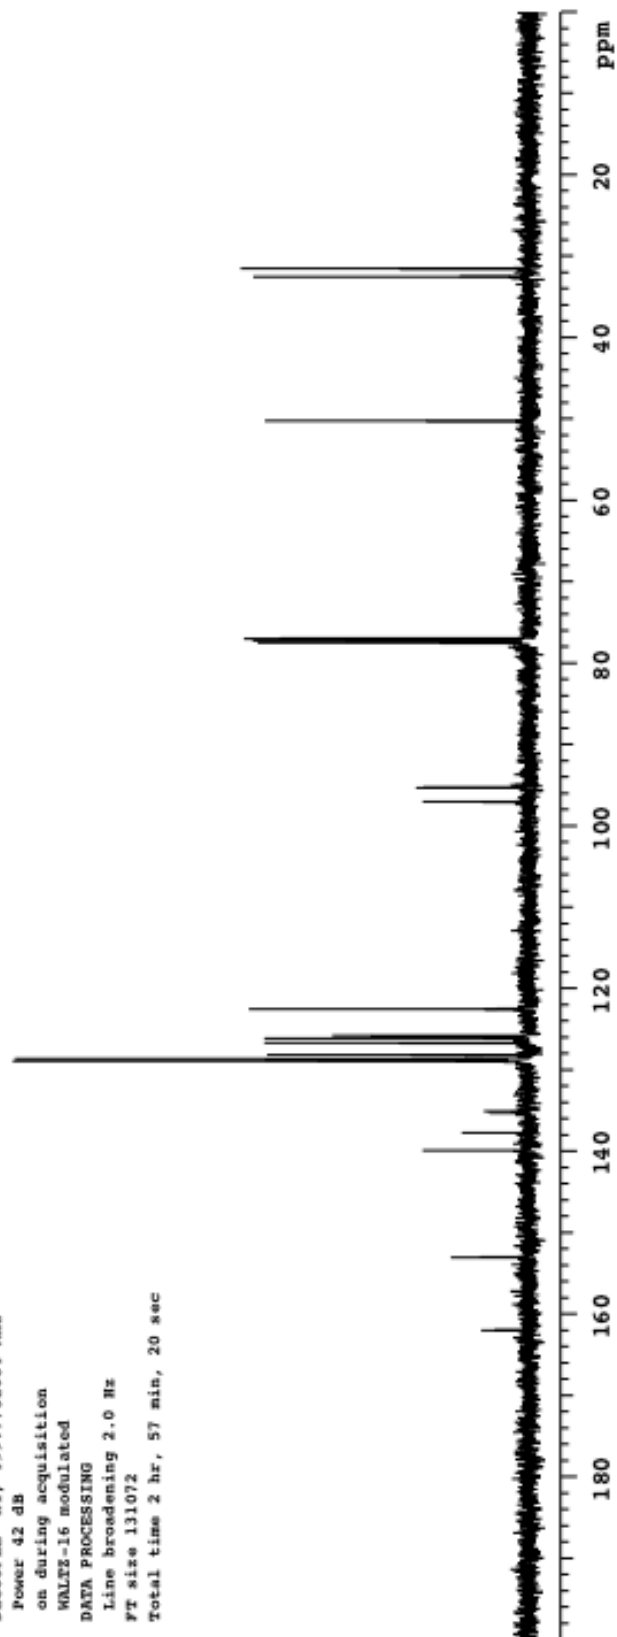

1222-RK-04-254-1stfraction

Archive directory: /export/home/mkl/vnmrSYS/data

Sample directory: auto\_13Dec2004

Pulse Sequence: s2pul

Solvent: cdcl3

Temp. 25.0 C / 298.1 K

Operator: barbara

File: 1222-RK-04-254-1stfraction

INOVA-500 "riga"

Relax. delay 1.000 sec

Pulse 45.0 degrees

Acq. time 1.892 sec

Width 7544.3 Hz

12 repetitions

OBSERVE H1, 499.7707212 MHz

DATA PROCESSING

Line broadening 0.1 Hz

FT size 32768

Total time 1 min, 32 sec

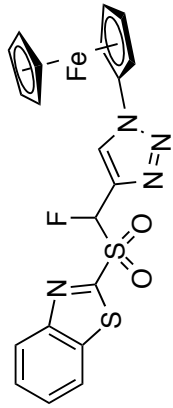

10

500 MHz, CDCl<sub>3</sub>

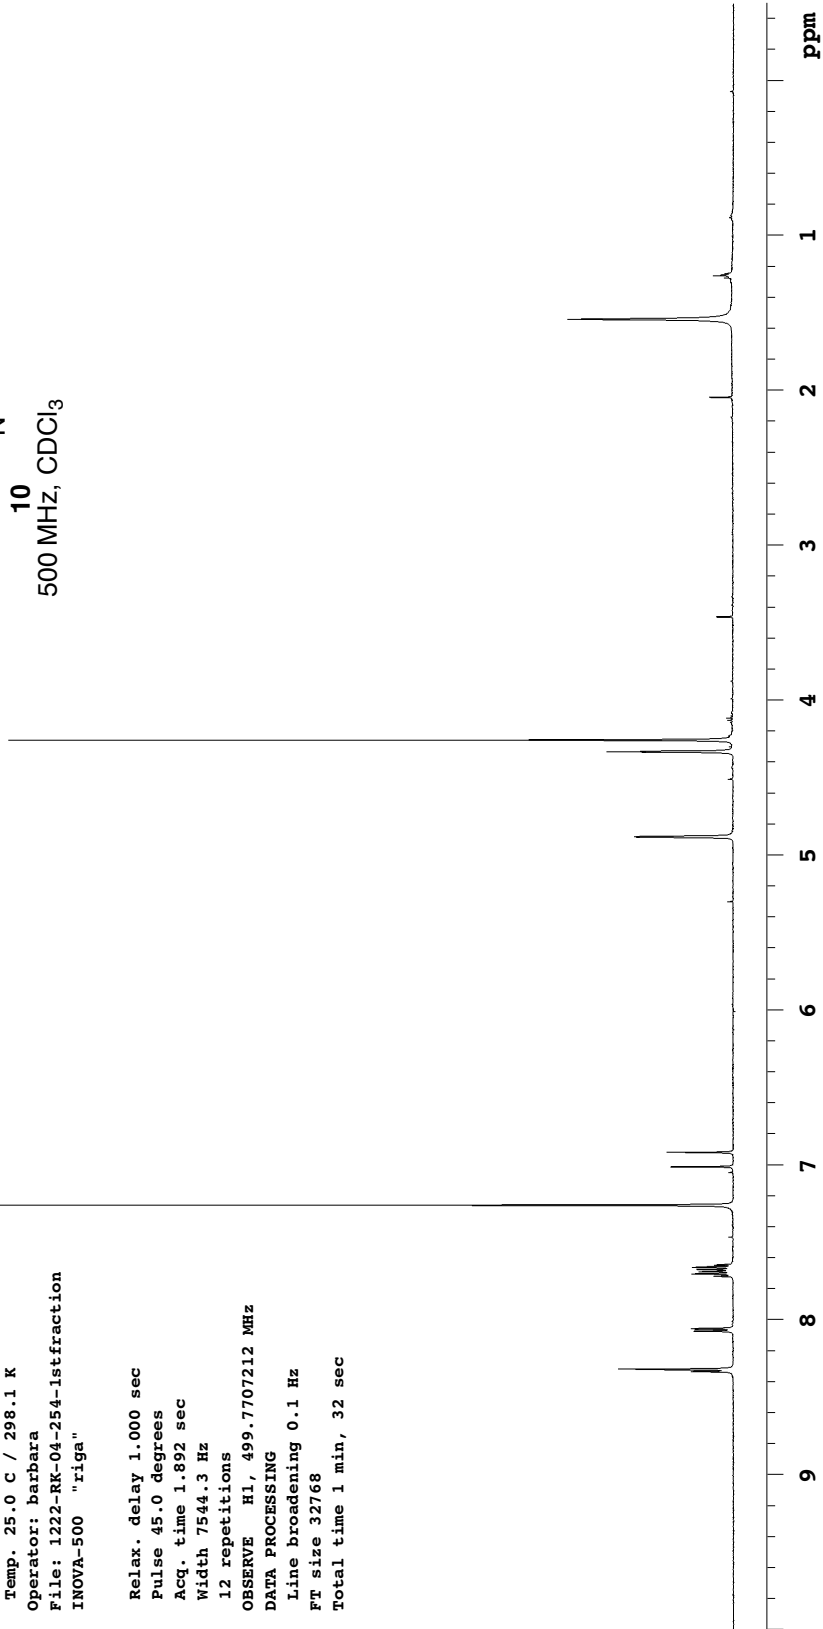

1222-RK-04-254-13C

Archive directory: /export/home/barbara/vnmrSYS/data

Sample directory:

Pulse sequence: s2pul

Solvent: CDCl3

Temp. 25.0 C / 298.1 K

Operator: barbara

File: 1222-RK-04-254-pure-13C

INOVA-500 "riga"

Relax. delay 4.000 sec

Pulse 52.1 degrees

Acq. time 1.300 sec

Width 29996.3 Hz

856 repetitions

OBSERVE C13, 125.6674205 MHz

DECOUPLE H1, 499.7732084 MHz

Power 42 dB

on during acquisition

WALTZ-16 modulated

DATA PROCESSING

Line broadening 2.0 Hz

FT size 131072

Total time 14 hr, 45 min, 15 sec

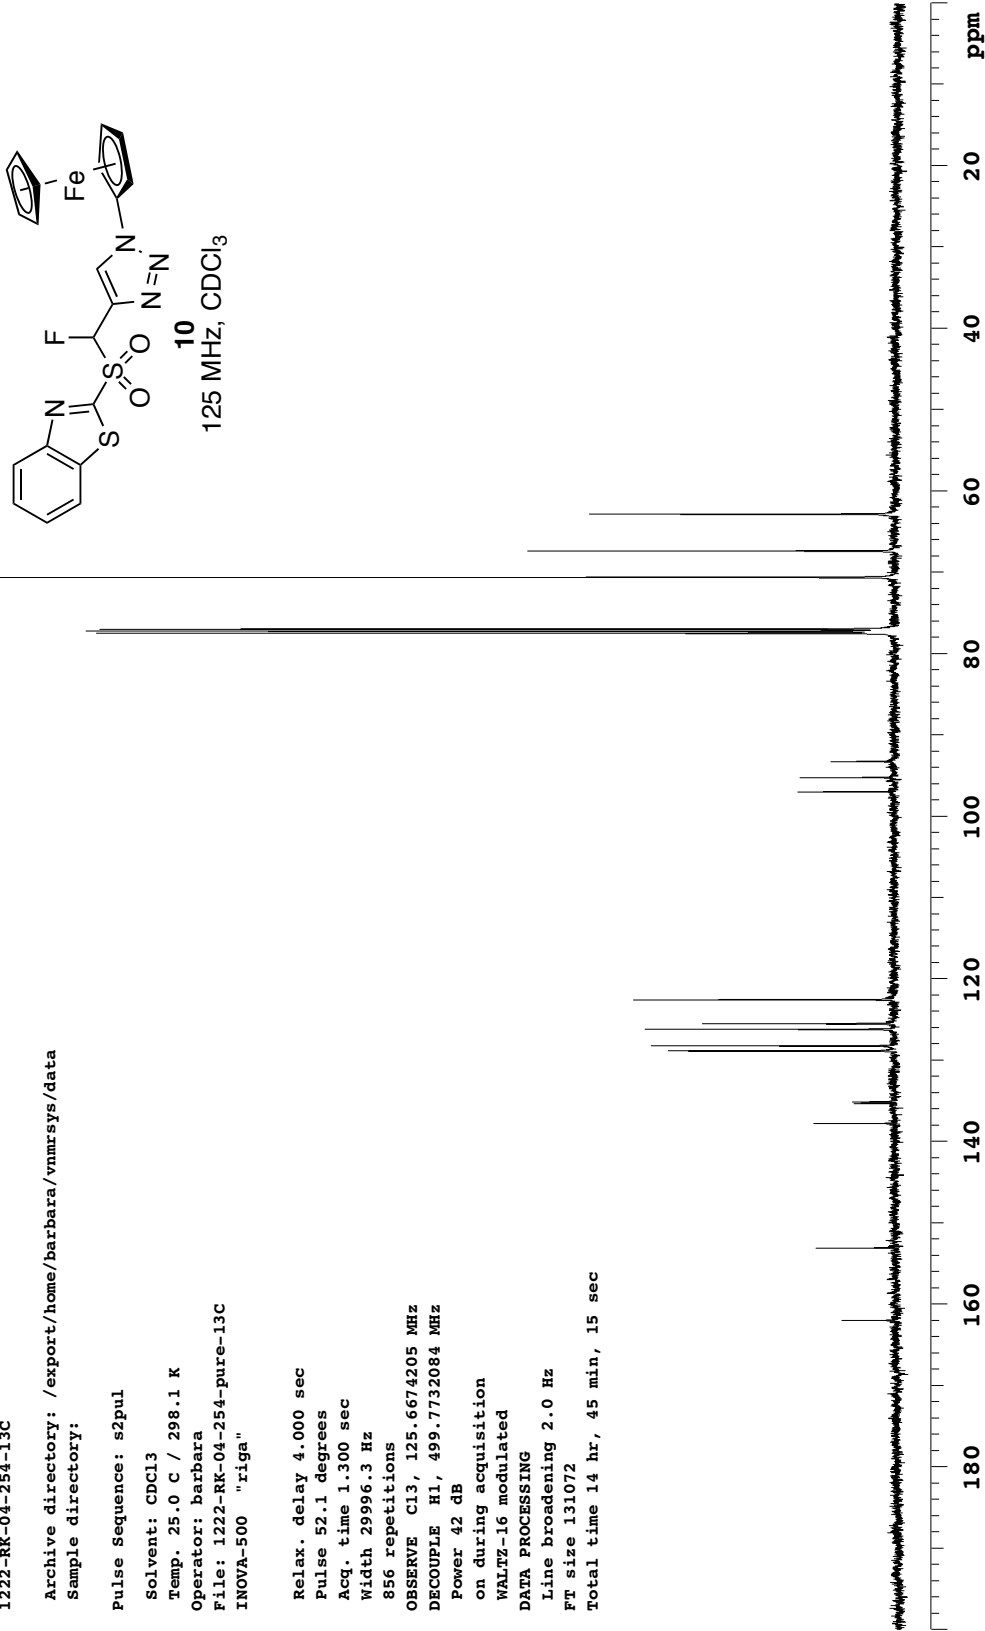

1222-RK-04-288

Archive directory: /export/home/mkl/vnmrSYS/data  
Sample directory: auto\_13Dec2004

Pulse Sequence: s2pul

Solvent: cdcl3

Temp. 25.0 C / 298.1 K

Operator: Barbara

File: 1222-RK-04-288

INOVA-500 "riga"

Relax. delay 1.000 sec

Pulse 45.0 degrees

Acq. time 1.892 sec

Width 10000.0 Hz

32 repetitions

OBSERVE H1, 499.7707209 MHz

DATA PROCESSING

Line broadening 1.0 Hz

FT size 65536

Total time 1 min, 32 sec

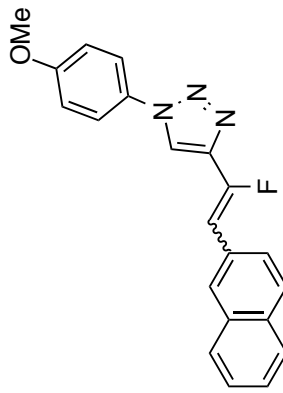

*E/Z*-11 by method B  
500 MHz, CDCl<sub>3</sub>

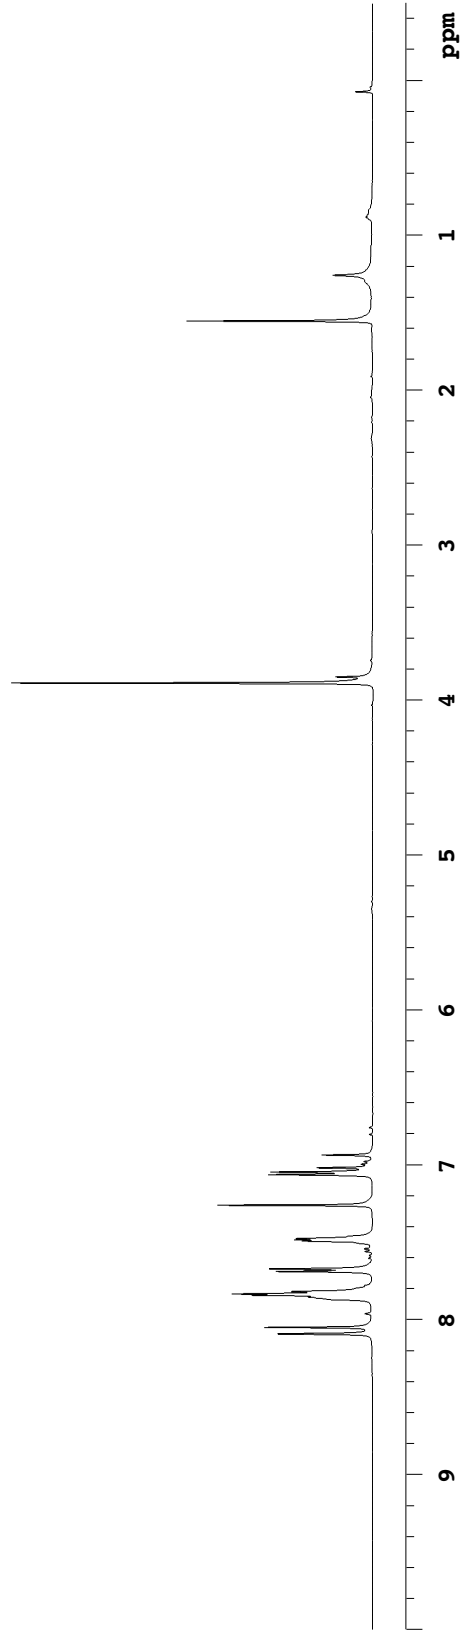

1222-RK-04-301-pure

Archive directory: /export/home/mkl/vnmrSYS/data  
Sample directory: auto\_13Dec2004

Pulse Sequence: s2pul

Solvent: cdcl3  
Temp. 25.0 C / 298.1 K  
Operator: Barbara  
File: 1222-RK-04-301-pure  
INOVA-500 "riga"

Relax. delay 1.000 sec  
Pulse 45.0 degrees  
Acq. time 1.892 sec  
Width 7544.3 Hz  
144 repetitions  
OBSERVE H1, 499.7707198 MHz  
DATA PROCESSING  
Line broadening 0.1 Hz  
FT size 32768  
Total time 9 min, 40 sec

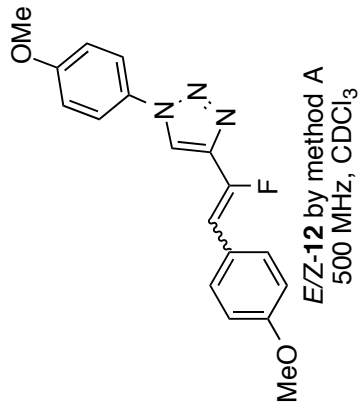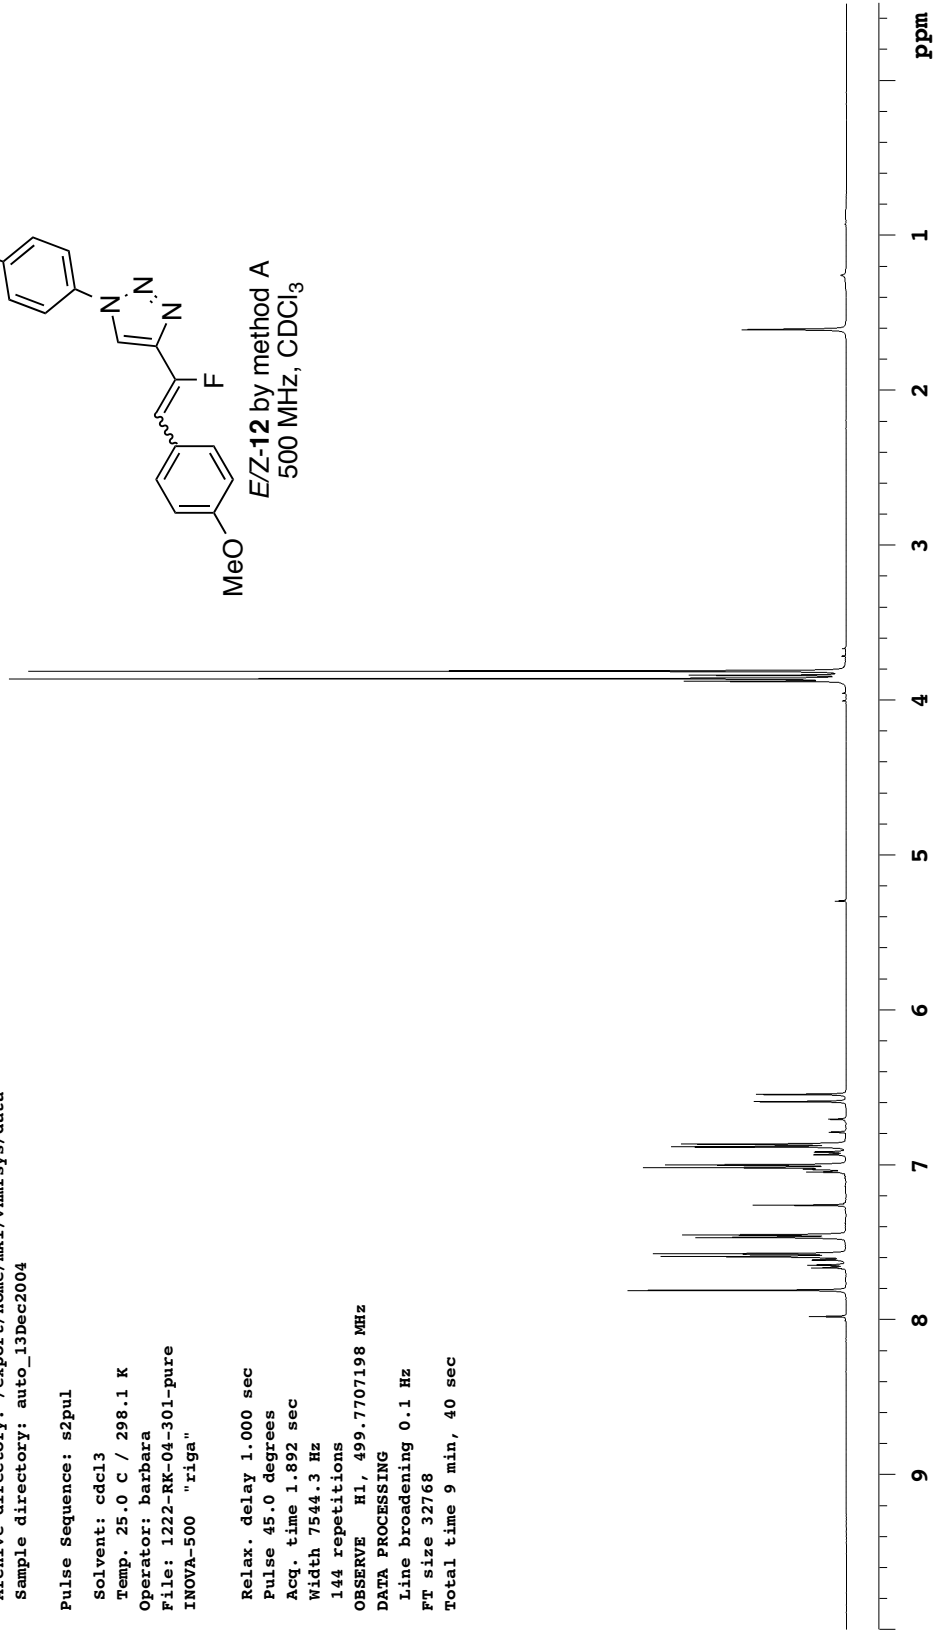



1222-RK-05-365-pure

Archive directory: /export/home/mkl/vnmrSYS/data  
Sample directory: auto\_13Dec2004

Pulse Sequence: s2pul

Solvent: dmsO  
Temp. 25.0 C / 298.1 K  
Operator: Barbara  
File: 1222-RK-05-365-pure  
INOVA-500 "riga"

Relax. delay 1.000 sec  
Pulse 45.0 degrees  
Acq. time 1.892 sec  
Width 7544.3 Hz  
32 repetitions  
OBSERVE H1, 499.7730834 MHz  
DATA PROCESSING  
Line broadening 0.1 Hz  
FT size 32768  
Total time 1 min, 32 sec

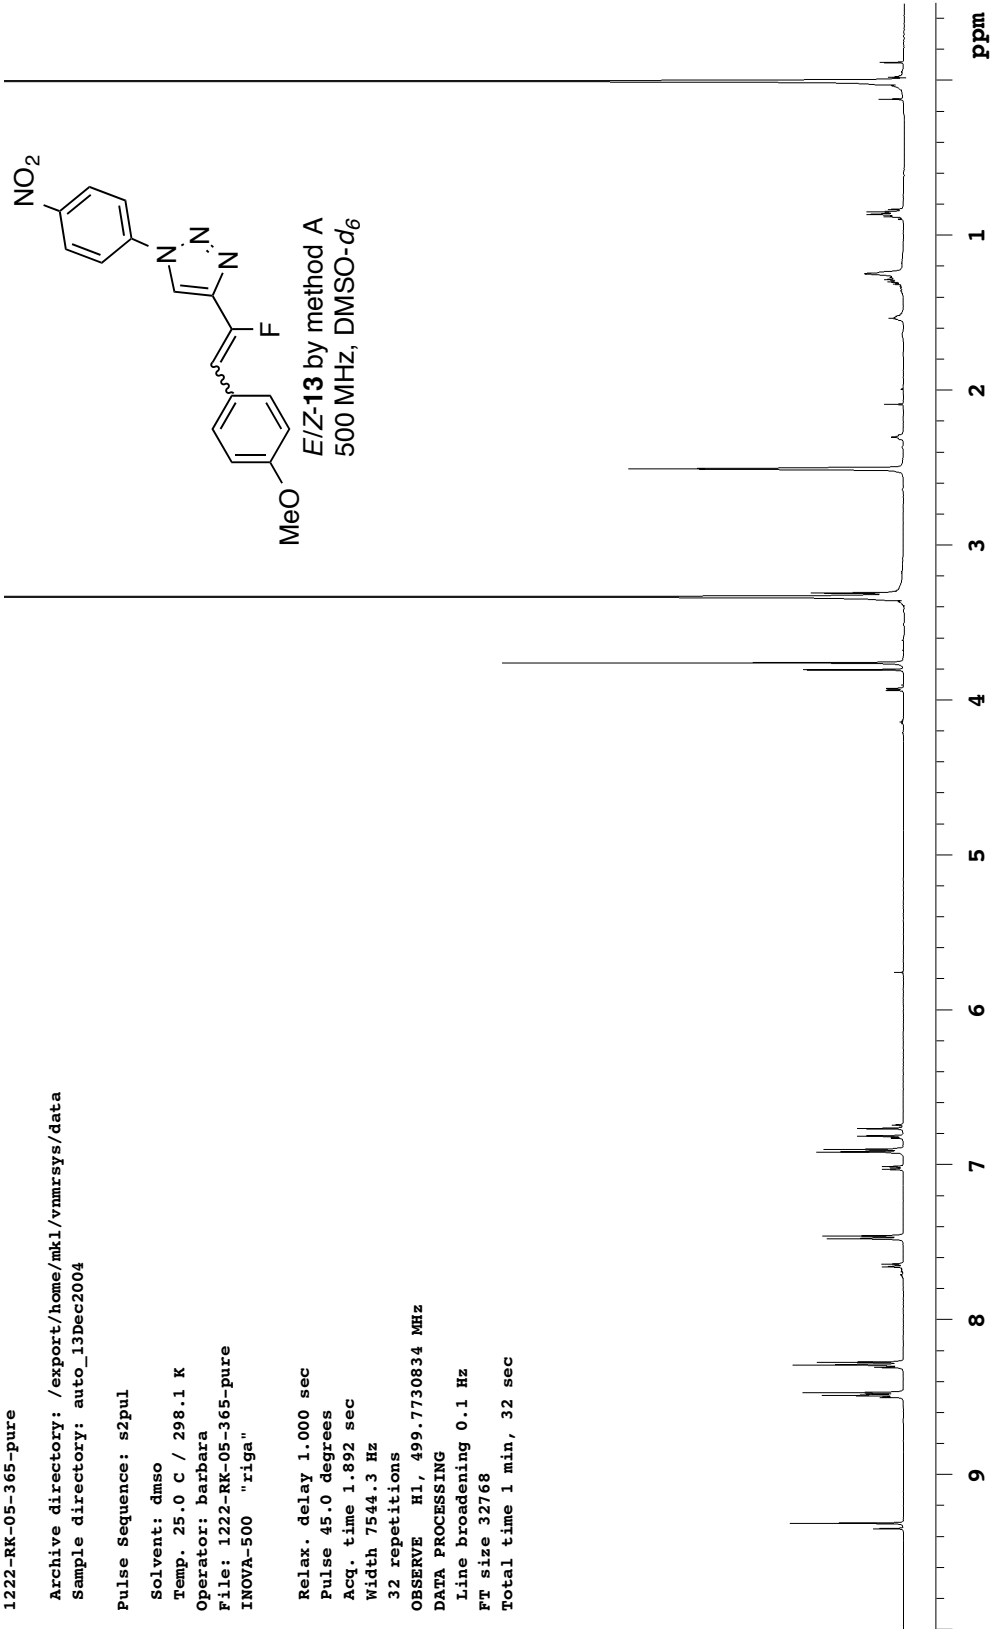

1222-RK-04-308-pure

Archive directory: /export/home/mkl/vnmrSYS/data  
Sample directory: auto\_13Dec2004

Pulse Sequence: s2pul

Solvent: cdcl3  
Temp. 25.0 C / 298.1 K  
Operator: Barbara  
File: 1222-RK-04-308-pure  
INOVA-500 "riga"

Relax. delay 1.000 sec  
Pulse 45.0 degrees  
Acq. time 1.892 sec  
Width 7544.3 Hz  
48 repetitions  
OBSERVE H1, 499.7707198 MHz  
DATA PROCESSING  
Line broadening 0.1 Hz  
FT size 32768  
Total time 9 min, 40 sec

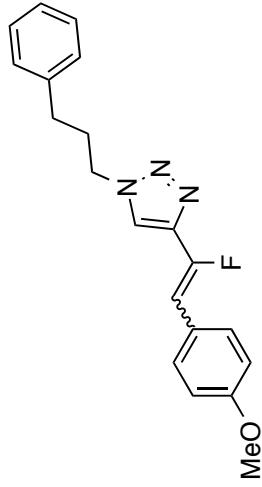

E/Z-14 by method A  
500 MHz, CDCl<sub>3</sub>

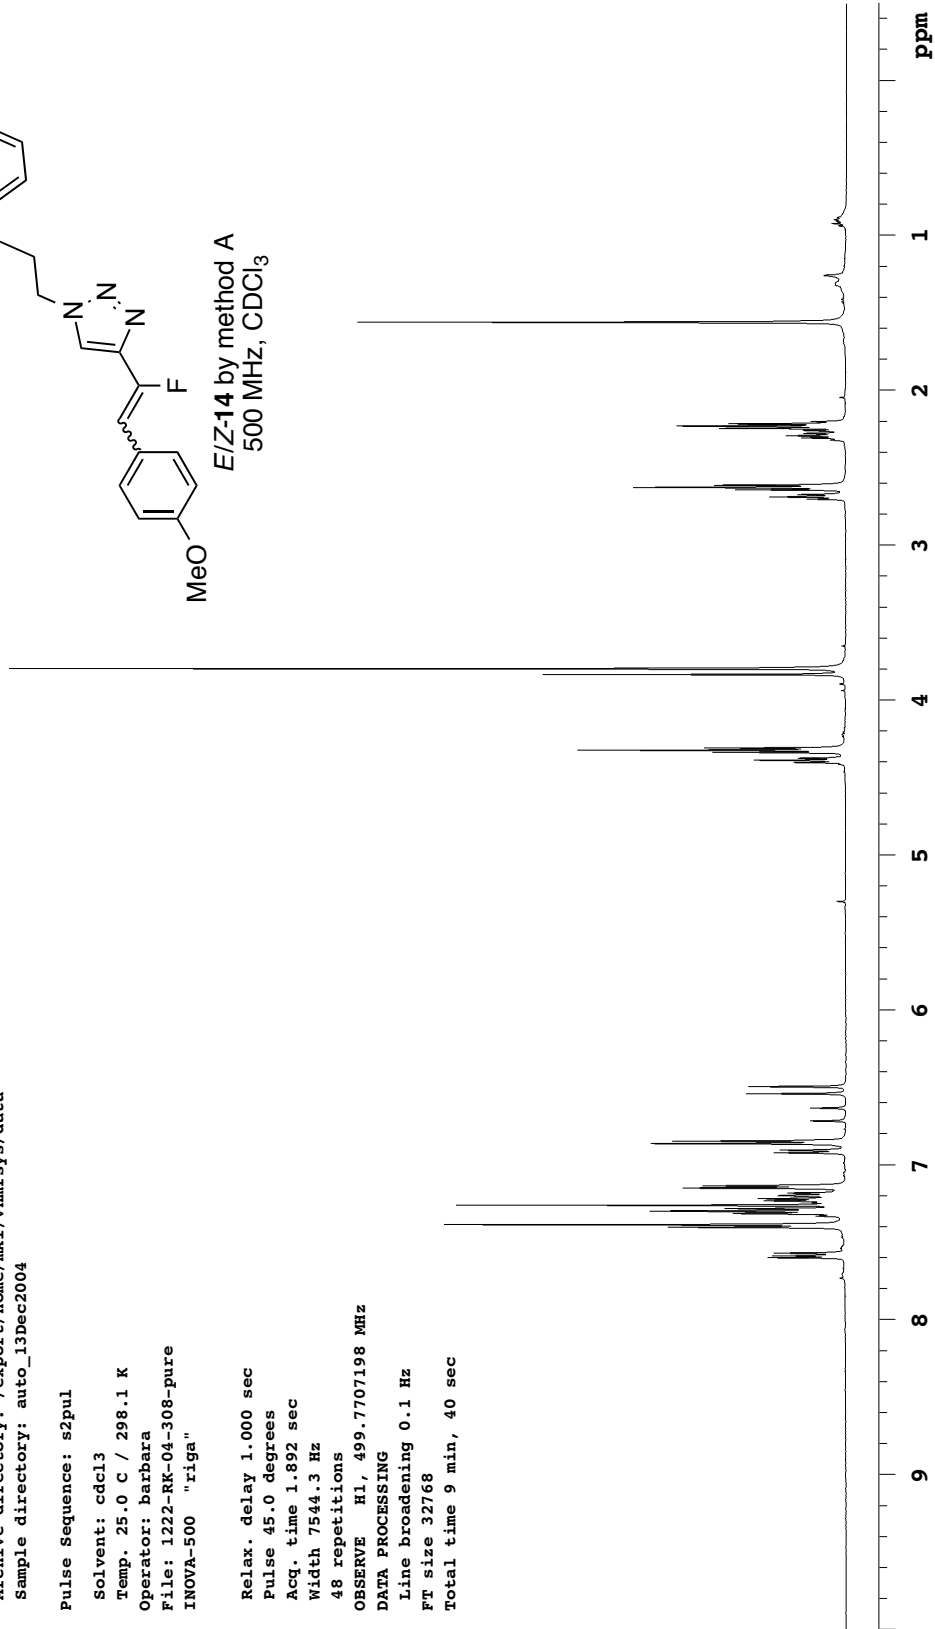

1222-RK-11-851-pure

Pulse Sequence: s2pul

Solvent: CDCl<sub>3</sub>

Ambient temperature

Operator: barbara

File: 1222-RK-11-851-pure

INOVA-500 "riga"

Pulse 48.0 degrees

Acq. time 1.892 sec

Width 8000.0 Hz

44 repetitions

OBSERVE H1, 499.7707217 MHz

DATA PROCESSING

FT size 32768

Total time 6 min, 20 sec

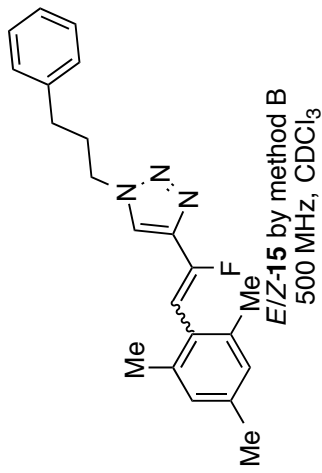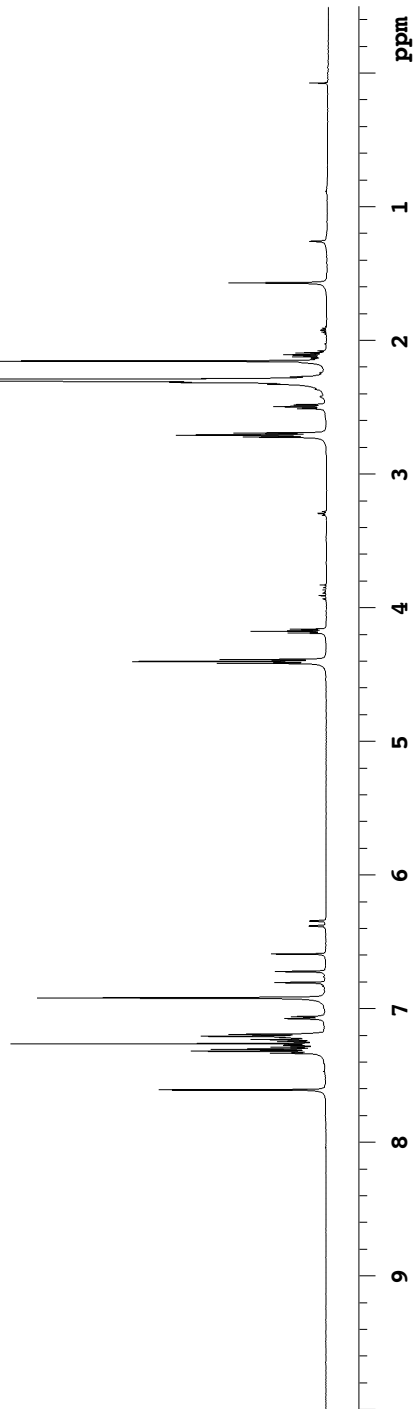

1231-RK-15-09-pure

Archive directory: /export/home/mkl/vnmrSYS/data  
Sample directory: auto\_13Dec2004

Pulse Sequence: s2pul

Solvent: cdcl3  
Temp. 24.0 C / 297.1 K  
Operator: Barbara  
File: 1231-RK-15-09-pure  
INOVA-500 "riga"

Relax. delay 1.000 sec  
Pulse 45.0 degrees  
Acq. time 1.892 sec  
Width 7544.3 Hz  
28 repetitions  
OBSERVE H1, 499.7707216 MHz  
DATA PROCESSING  
Line broadening 0.1 Hz  
FT size 32768  
Total time 9 min, 40 sec

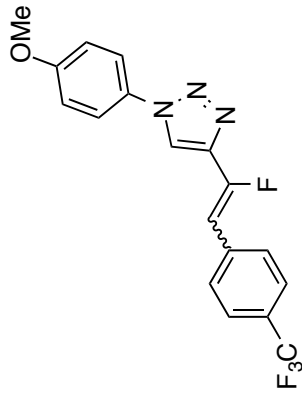

E/Z-16 by method A  
500 MHz, CDCl<sub>3</sub>

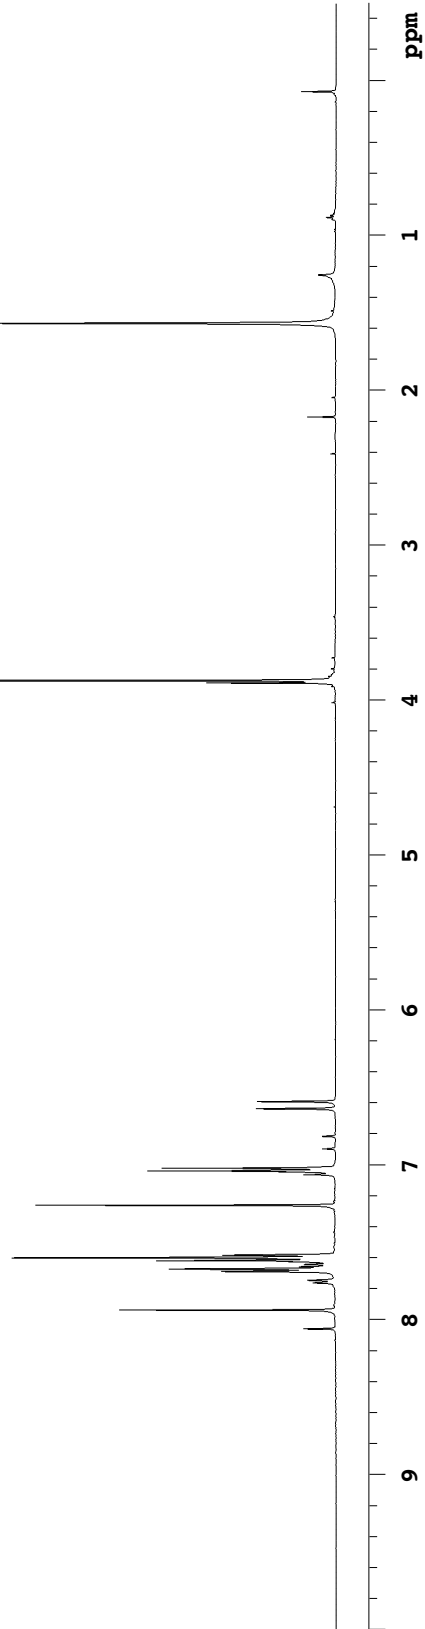

1231-RK-14-85-pure

Archive directory: /export/home/mkl/vnmrSYS/data  
Sample directory: auto\_13Dec2004

Pulse Sequence: s2pul

Solvent: cdcl3  
Ambient temperature  
Operator: Barbara  
File: 1231-RK-14-85-pure  
INOVA-500 "riga"

Relax. delay 1.000 sec  
Pulse 45.0 degrees  
Acq. time 1.892 sec  
Width 7544.3 Hz  
12 repetitions

OBSERVE H1, 499.7707221 MHz  
DATA PROCESSING  
Line broadening 0.1 Hz  
FT size 32768  
Total time 9 min, 40 sec

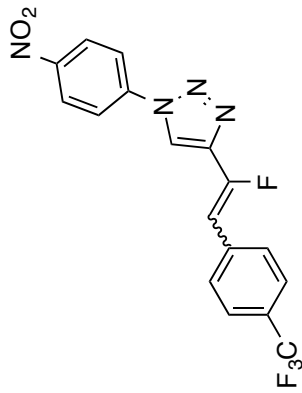

E/Z-17 by method A  
500 MHz, CDCl<sub>3</sub>

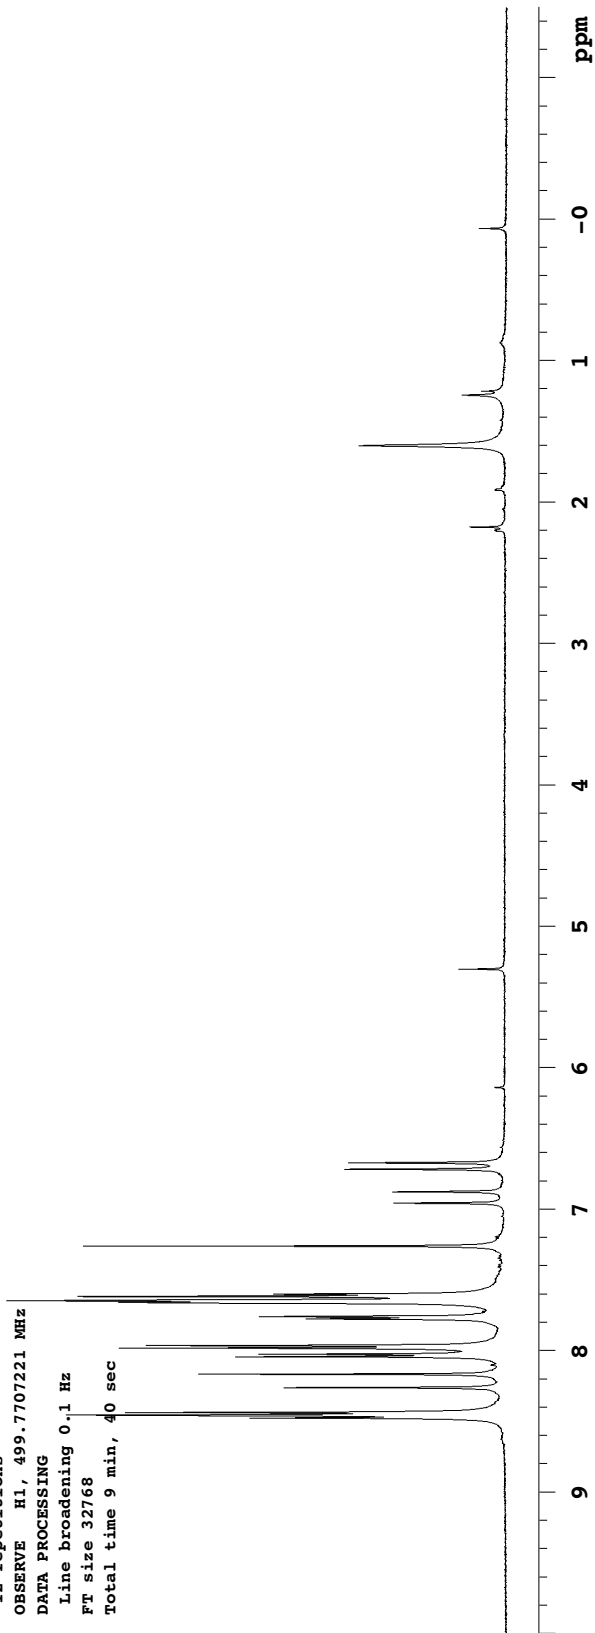

1231-RK-14-86-pure

Archive directory: /export/home/mkl/vnmrSYS/data  
Sample directory: auto\_13Dec2004

Pulse Sequence: s2pul

Solvent: cdcl3  
Ambient temperature  
Operator: Barbara  
File: 1231-RK-14-86-pure  
INOVA-500 "riga"

Relax. delay 1.000 sec  
Pulse 45.0 degrees  
Acq. time 1.892 sec  
Width 7544.3 Hz  
12 repetitions  
OBSERVE H1, 499.7707221 MHz  
DATA PROCESSING  
Line broadening 0.1 Hz  
FT size 32768  
Total time 9 min, 40 sec

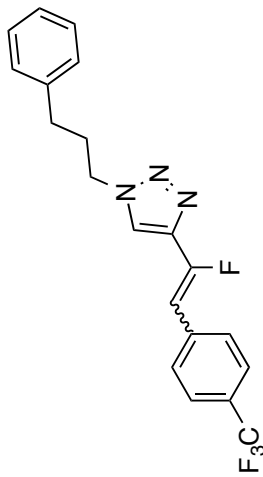

E/Z-18 by methodA  
500 MHz, CDCl<sub>3</sub>

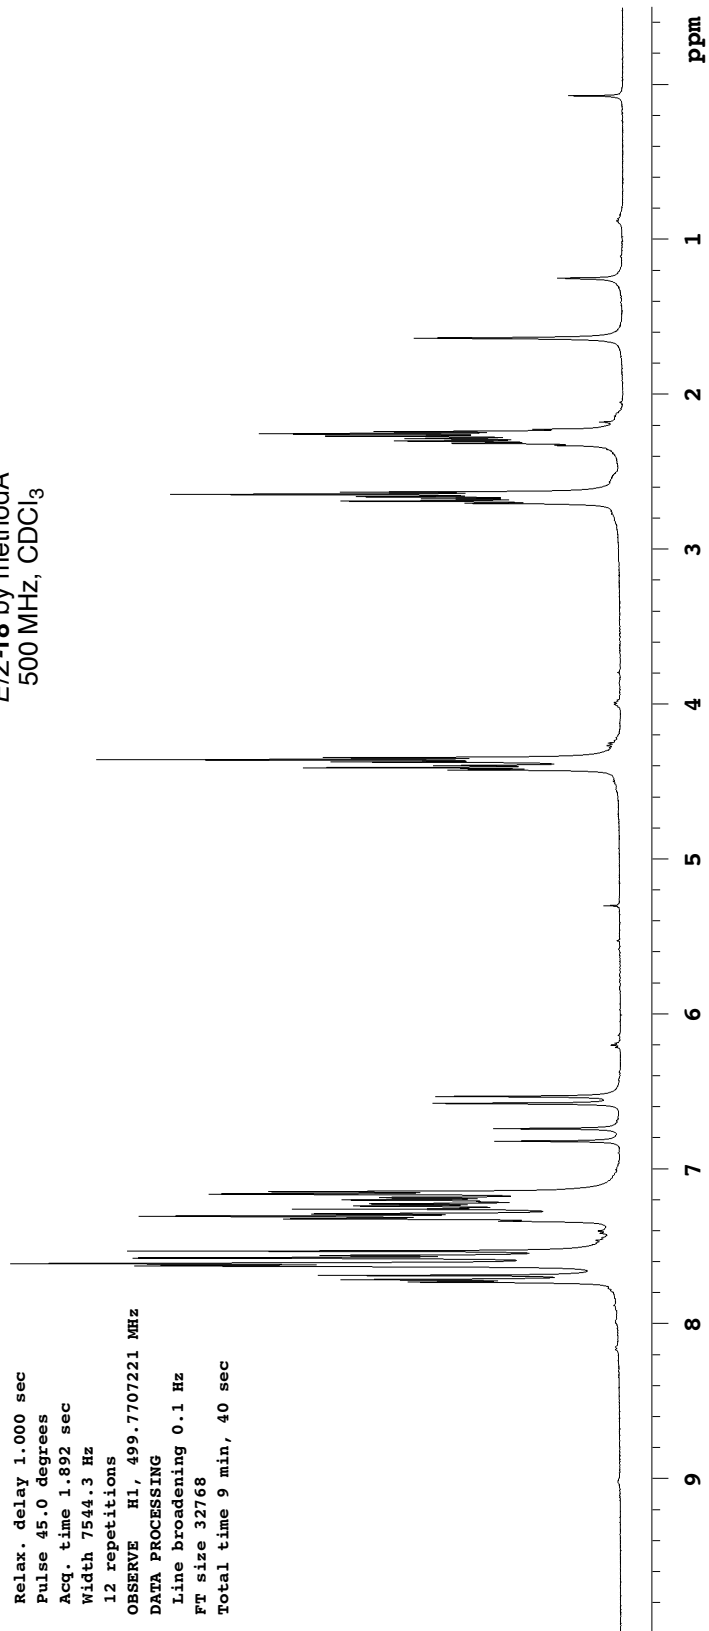

1222-RK-04-314-pure

Archive directory: /export/home/barbara/vnmrSYS/data

Sample directory:

Pulse Sequence: s2pul

Solvent: cdcl3

Temp. 25.0 C / 298.1 K

Operator: barbara

File: 1222-RK-04-314-pure

INOVA-500 "riga"

Relax. delay 1.000 sec

Pulse 45.0 degrees

Acq. time 1.892 sec

Width 7544.3 Hz

64 repetitions

OBSERVE H1, 499.7707189 MHz

DATA PROCESSING

Line broadening 0.1 Hz

FT size 32768

Total time 9 min, 40 sec

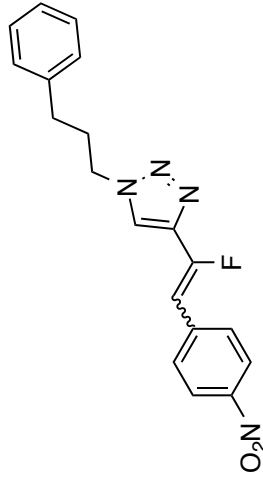

E/Z-19 by method B  
500 MHz, CDCl<sub>3</sub>

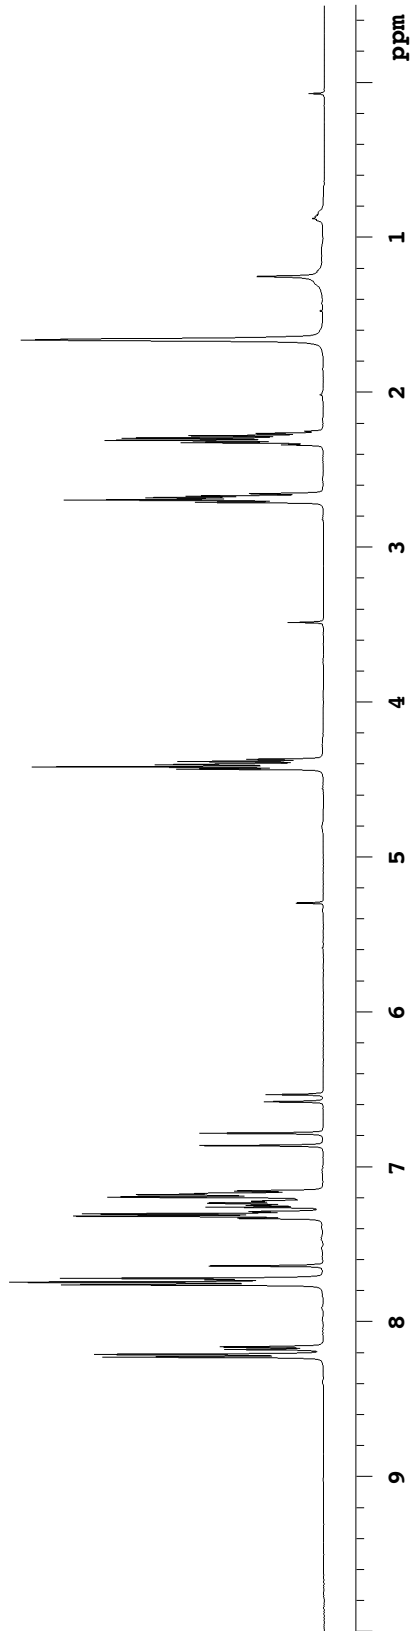

1222-RK-04-328-1stfraction

Archive directory: /export/home/mkl/vnmrsys/data

Sample directory: auto\_13Dec2004

Pulse Sequence: s2pul

Solvent: cdcl3

Temp. 25.0 C / 298.1 K

Operator: barbara

File: 1222-RK-04-328-1stfraction

INOVA-500 "riga"

Relax. delay 1.000 sec

Pulse 45.0 degrees

Acq. time 1.892 sec

Width 7544.3 Hz

20 repetitions

OBSERVE H1, 499.7707189 MHz

DATA PROCESSING

Line broadening 0.1 Hz

FT size 32768

Total time 1 min, 32 sec

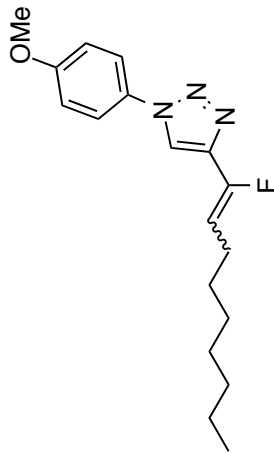

*E/Z*-20 by method B  
500 MHz, CDCl<sub>3</sub>

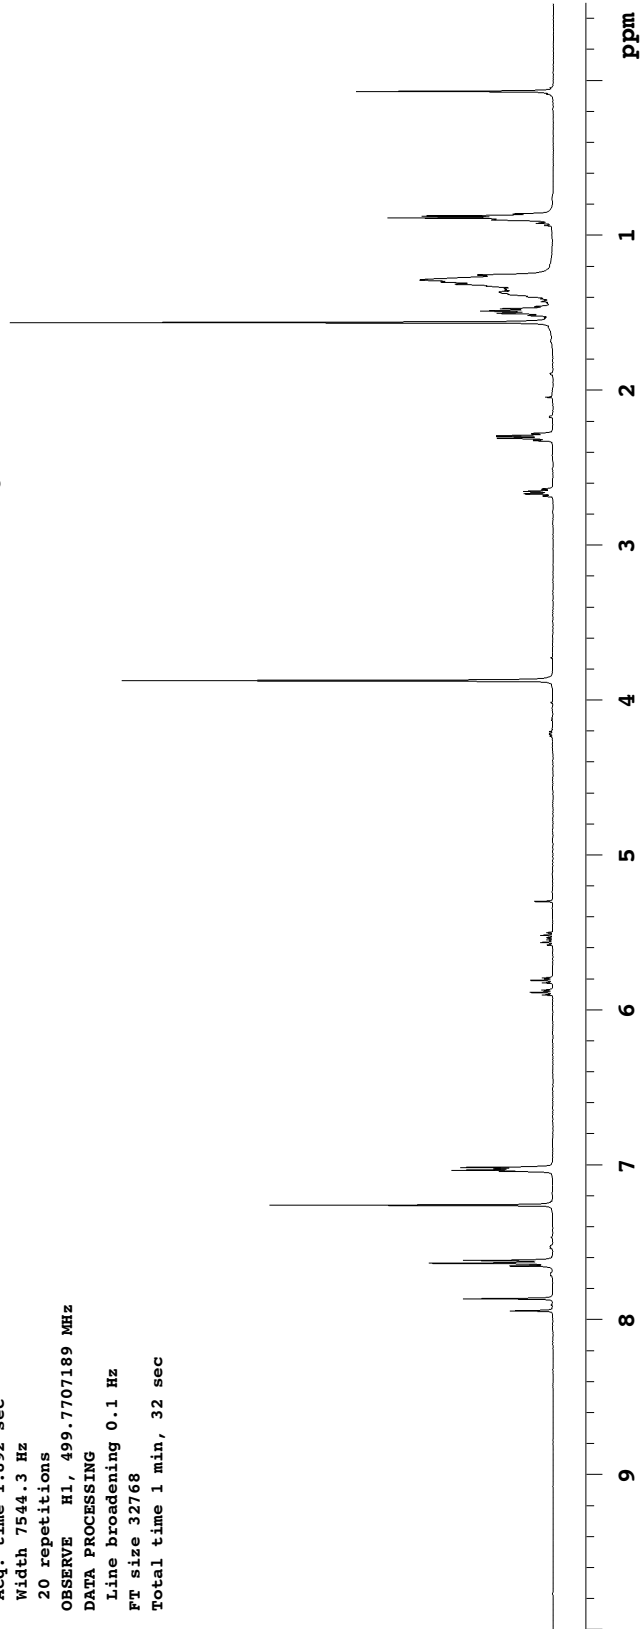



1222-RK-05-346-pure

Archive directory: /export/home/mkl/vnmrSYS/data  
Sample directory: auto\_13Dec2004

Pulse Sequence: s2pul

Solvent: cdcl3  
Temp. 25.0 C / 298.1 K  
Operator: Barbara  
File: 1222-RK-05-346-pure  
INOVA-500 "riga"

Relax. delay 1.000 sec  
Pulse 45.0 degrees  
Acq. time 1.892 sec  
Width 7544.3 Hz  
12 repetitions  
OBSERVE H1, 499.7707207 MHz  
DATA PROCESSING  
Line broadening 0.1 Hz  
FT size 32768  
Total time 9 min, 40 sec

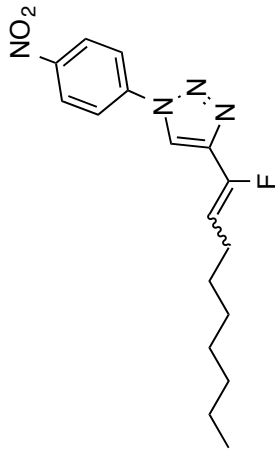

E/Z-21 by method B  
500 MHz, CDCl<sub>3</sub>

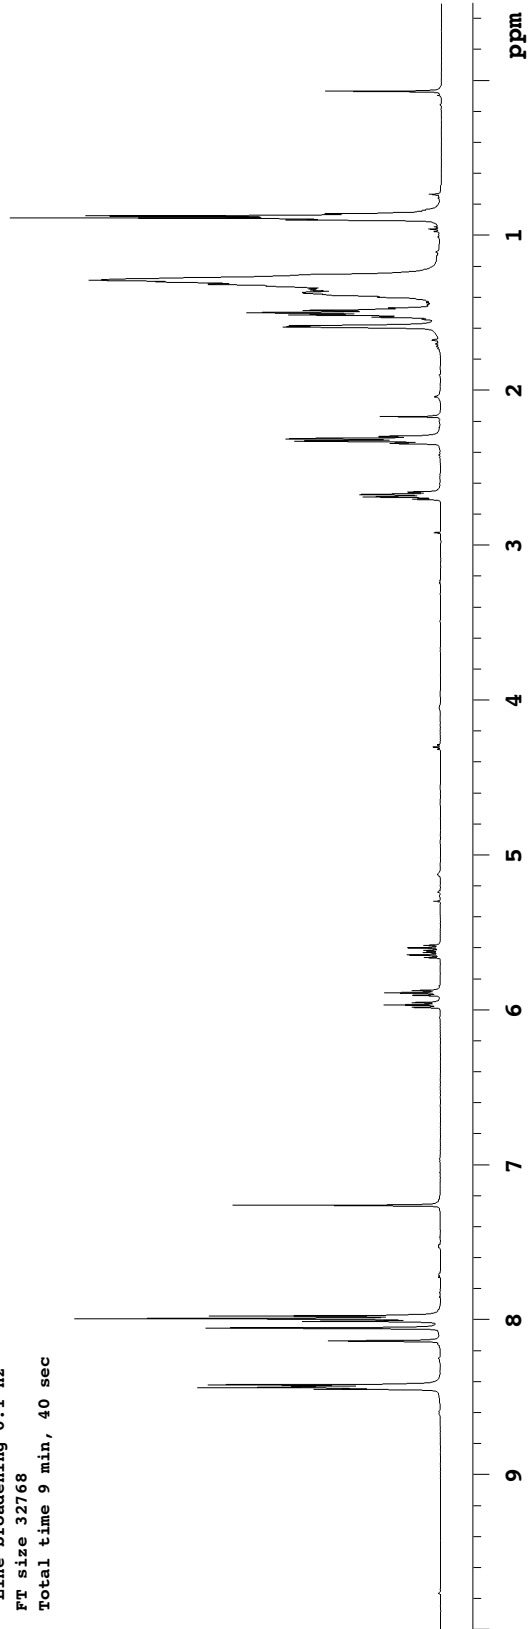

1222-RK-04-312-pure-2

Archive directory: /export/home/barbara/vnmrSYS/data

Sample directory:

Pulse Sequence: s2pul

Solvent: cdcl3

Temp. 25.0 C / 298.1 K

Operator: barbara

File: 1222-RK-04-312-pure-2

INOVA-500 "riga"

Relax. delay 1.000 sec

Pulse 45.0 degrees

Acq. time 1.892 sec

Width 7544.3 Hz

36 repetitions

OBSERVE H1, 499.7707193 MHz

DATA PROCESSING

Line broadening 0.1 Hz

FT size 32768

Total time 9 min, 40 sec

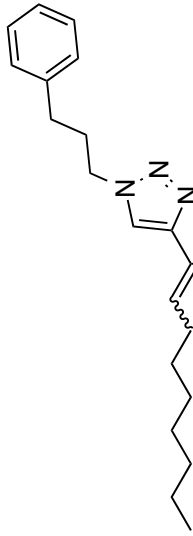

E/Z-22 by method B  
500 MHz, CDCl<sub>3</sub>

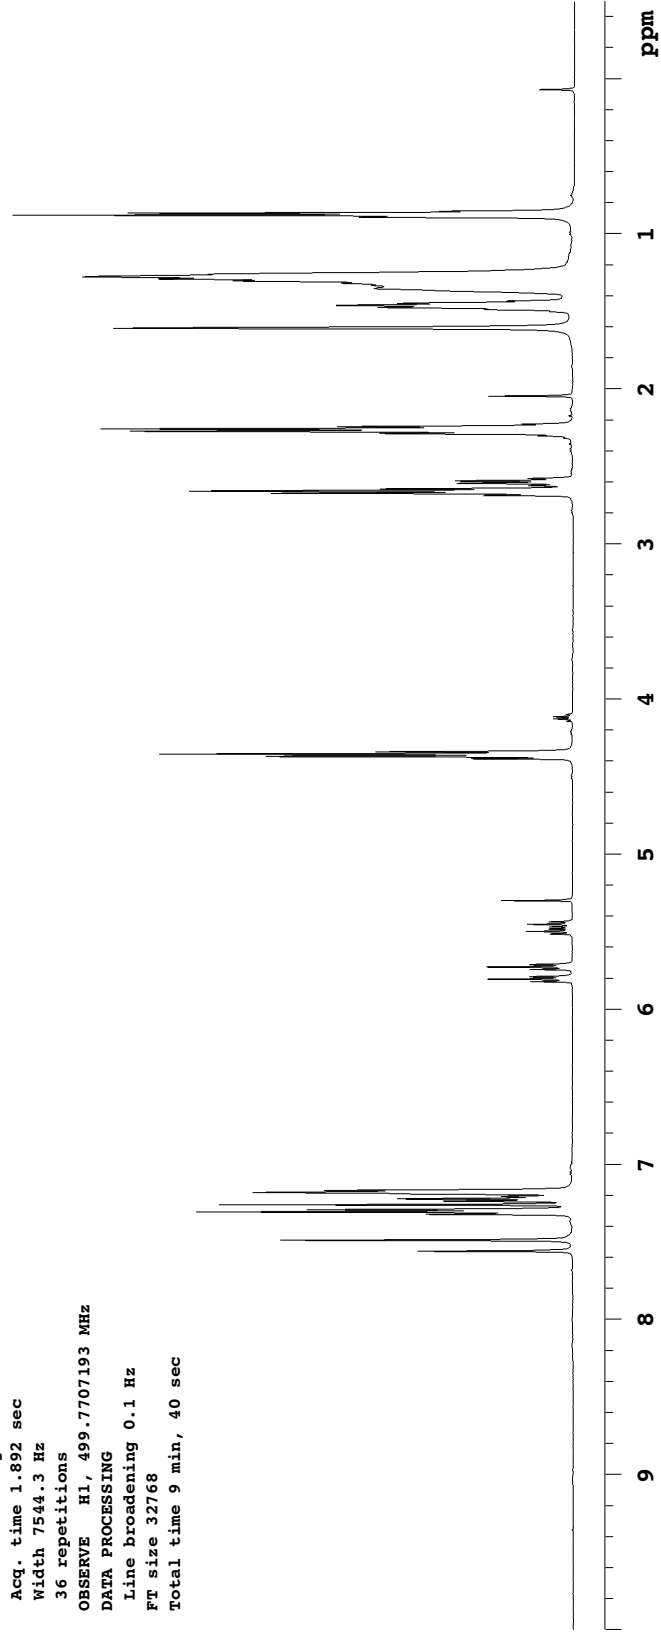

1222-RK-05-352

Archive directory: /export/home/mkl/vnmrSYS/data  
Sample directory: auto\_13Dec2004

Pulse Sequence: s2pul

Solvent: cdcl3  
Temp. 25.0 C / 298.1 K  
Operator: Barbara  
File: 1222-RK-05-352  
INOVA-500 "riga"

Relax. delay 1.000 sec  
Pulse 45.0 degrees  
Acq. time 1.892 sec  
Width 7544.3 Hz  
20 repetitions  
OBSERVE H1, 499.7707198 MHz  
DATA PROCESSING  
FT size 32768  
Total time 1 min, 32 sec

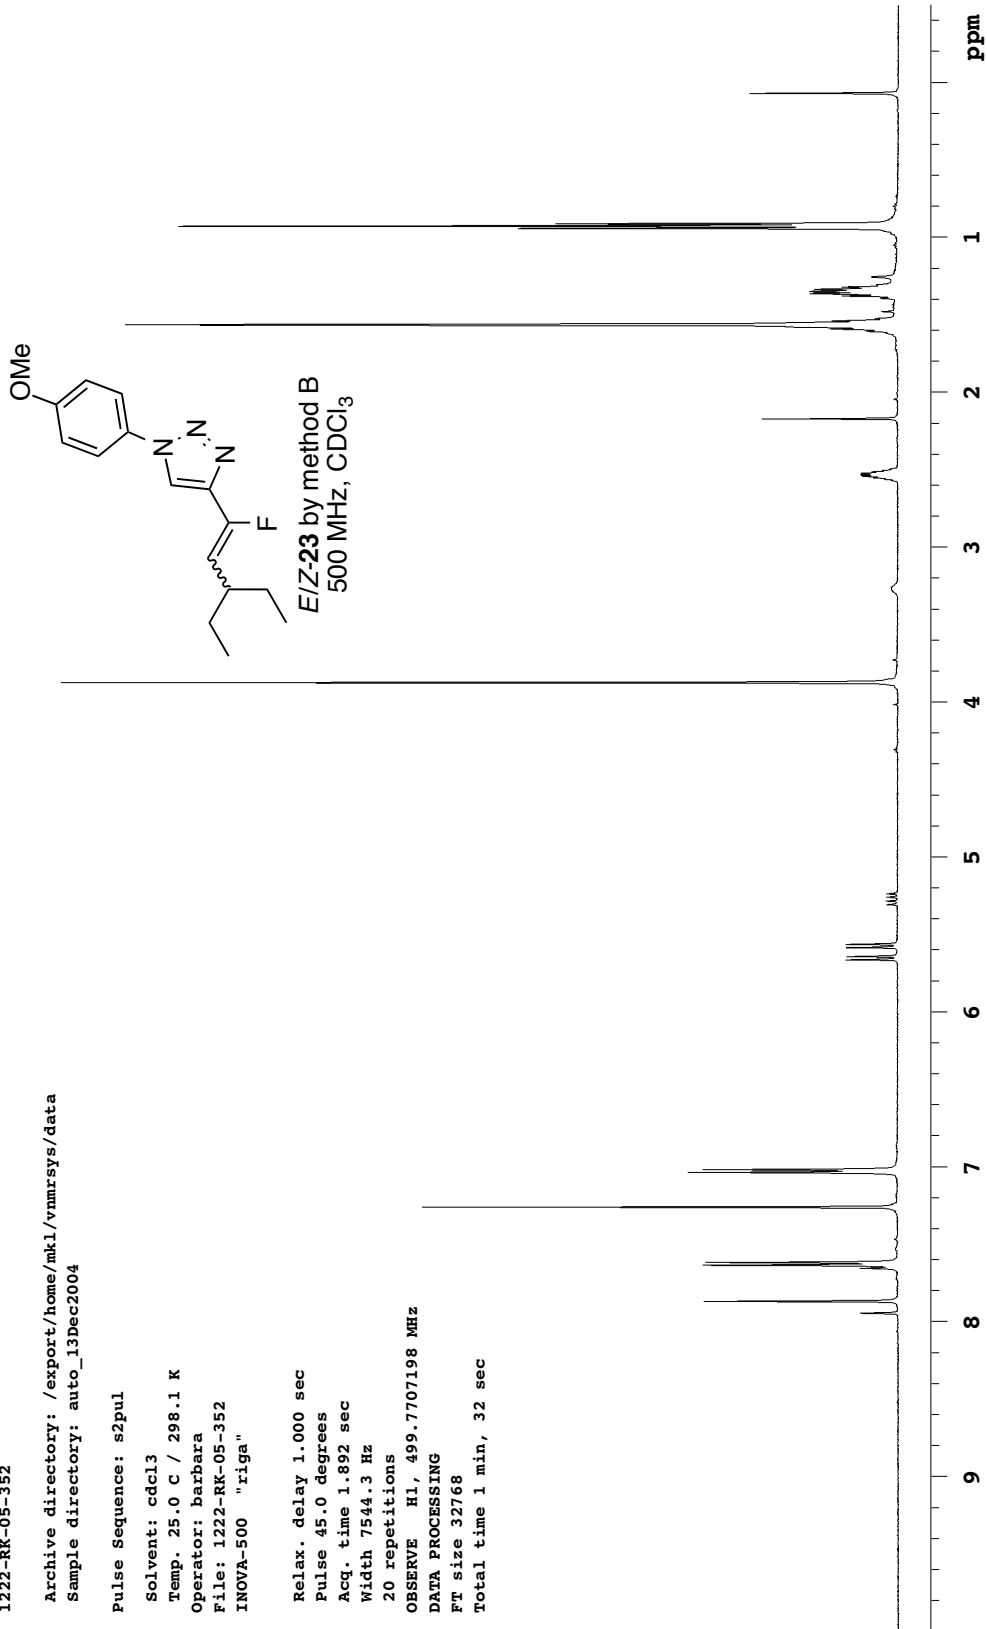

1222-RK-05-349

Archive directory: /export/home/mkl/vnmrSYS/data  
Sample directory: auto\_13Dec2004

Pulse Sequence: s2pul

Solvent: cdcl3  
Temp. 25.0 C / 298.1 K  
Operator: Barbara  
File: 1222-RK-05-349  
INOVA-500 "riga"

Relax. delay 1.000 sec  
Pulse 45.0 degrees  
Acq. time 1.892 sec  
Width 10000.0 Hz  
48 repetitions

OBSERVE H1, 499.7707203 MHz

DATA PROCESSING

Line broadening 0.5 Hz  
FT size 65536  
Total time 4 min, 50 sec

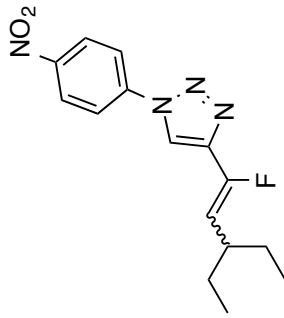

*E/Z-24* by method B  
500 MHz, CDCl<sub>3</sub>

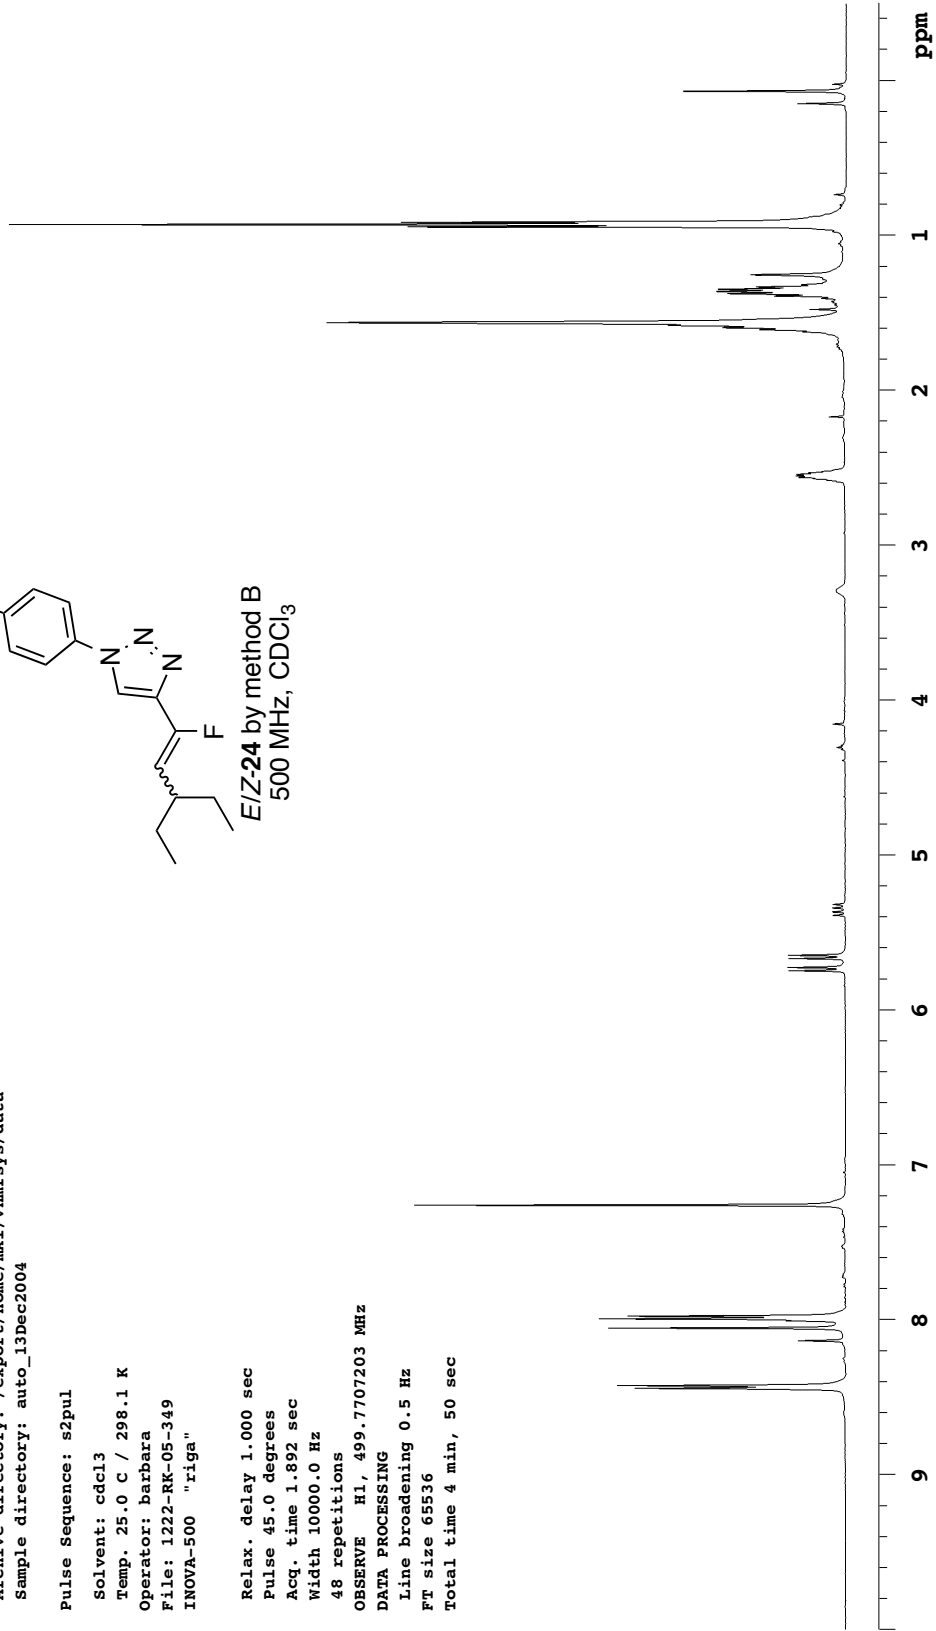

1222-RK-05-336

Archive directory: /export/home/mkl/vnmrSYS/data  
Sample directory: auto\_13Dec2004  
File: 1222-RK-05-336

Pulse Sequence: s2pul

Solvent: cdcl3  
Temp. 25.0 C / 298.1 K  
Operator: barbara  
File: 1222-RK-05-336  
INOVA-500 "capella500"

Relax. delay 1.000 sec  
Pulse 45.0 degrees  
Acq. time 1.892 sec  
Width 7544.3 Hz  
16 repetitions  
OBSERVE H1, 499.7707226 MHz  
DATA PROCESSING  
Line broadening 0.1 Hz  
FT size 32768  
Total time 9 min, 40 sec

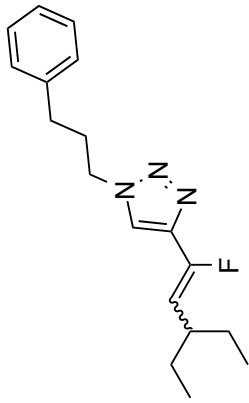

*E/Z*-25 by method B  
500 MHz, CDCl<sub>3</sub>

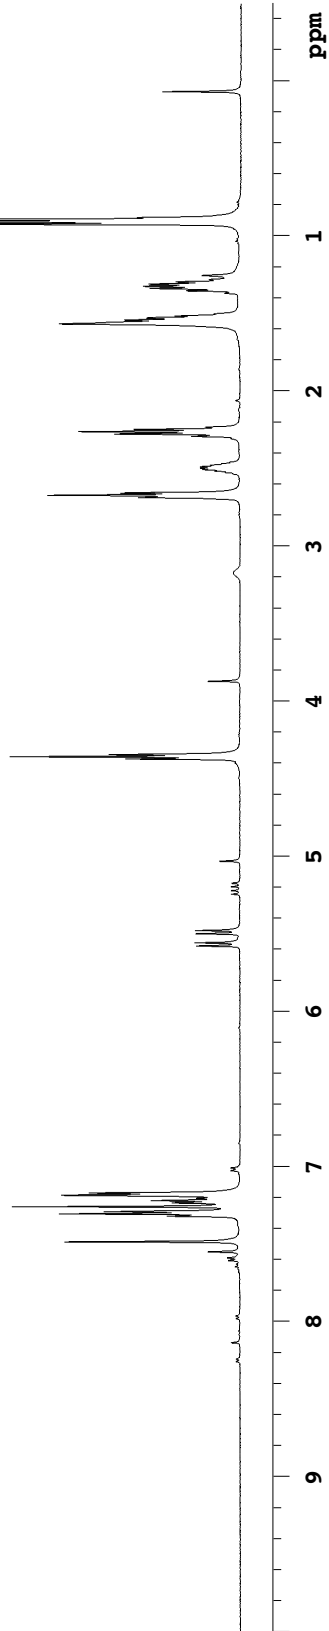

1222-RK-05-392-pure

Archive directory: /export/home/mkl/vnmrSYS/data  
Sample directory: auto\_13Dec2004

Pulse Sequence: s2pul

Solvent: cdcl3  
Temp. 25.0 C / 298.1 K  
Operator: Barbara  
File: 1222-RK-05-392-pure  
INOVA-500 "riga"

Relax. delay 1.000 sec  
Pulse 45.0 degrees  
Acq. time 1.892 sec  
Width 10000.0 Hz  
16 repetitions  
OBSERVE H1, 499.7707212 MHz  
DATA PROCESSING  
Line broadening 0.1 Hz  
FT size 65536  
Total time 1 min, 32 sec

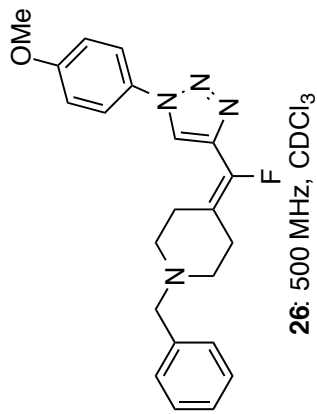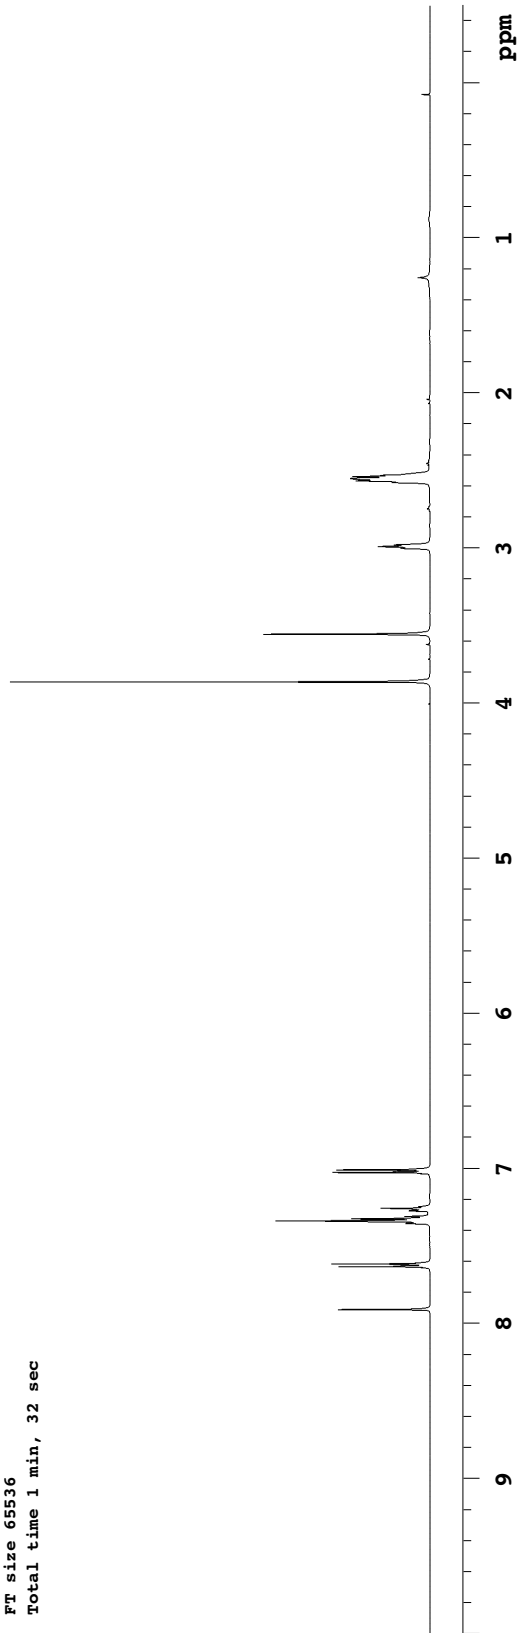

1222-RK-05-392-p-13C

Archive directory: /export/home/barbara/vnmrSYS/data  
File: 1222-RK-05-392-p-13C

Pulse Sequence: s2pul

Solvent: CDCl<sub>3</sub>  
Temp. 25.0 C / 298.1 K  
Operator: Barbara  
File: 1222-RK-05-392-p-13C  
INOVA-500 "capella500"

Relax. delay 4.000 sec  
Pulse 52.1 degrees  
Acq. time 1.300 sec  
Width 29996.3 Hz  
320 repetitions  
OBSERVE C13, 125.6674218 MHz  
DECOUPLE H1, 499.7732084 MHz  
Power 42 dB  
on during acquisition  
WALTZ-16 modulated  
DATA PROCESSING  
Line broadening 2.0 Hz  
FT size 131072  
Total time 2 hr, 57 min, 20 sec

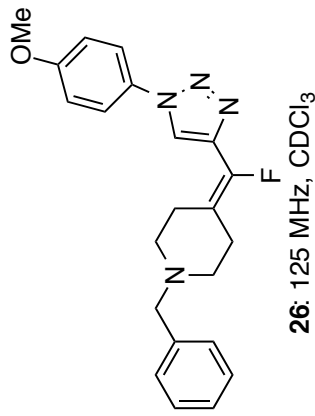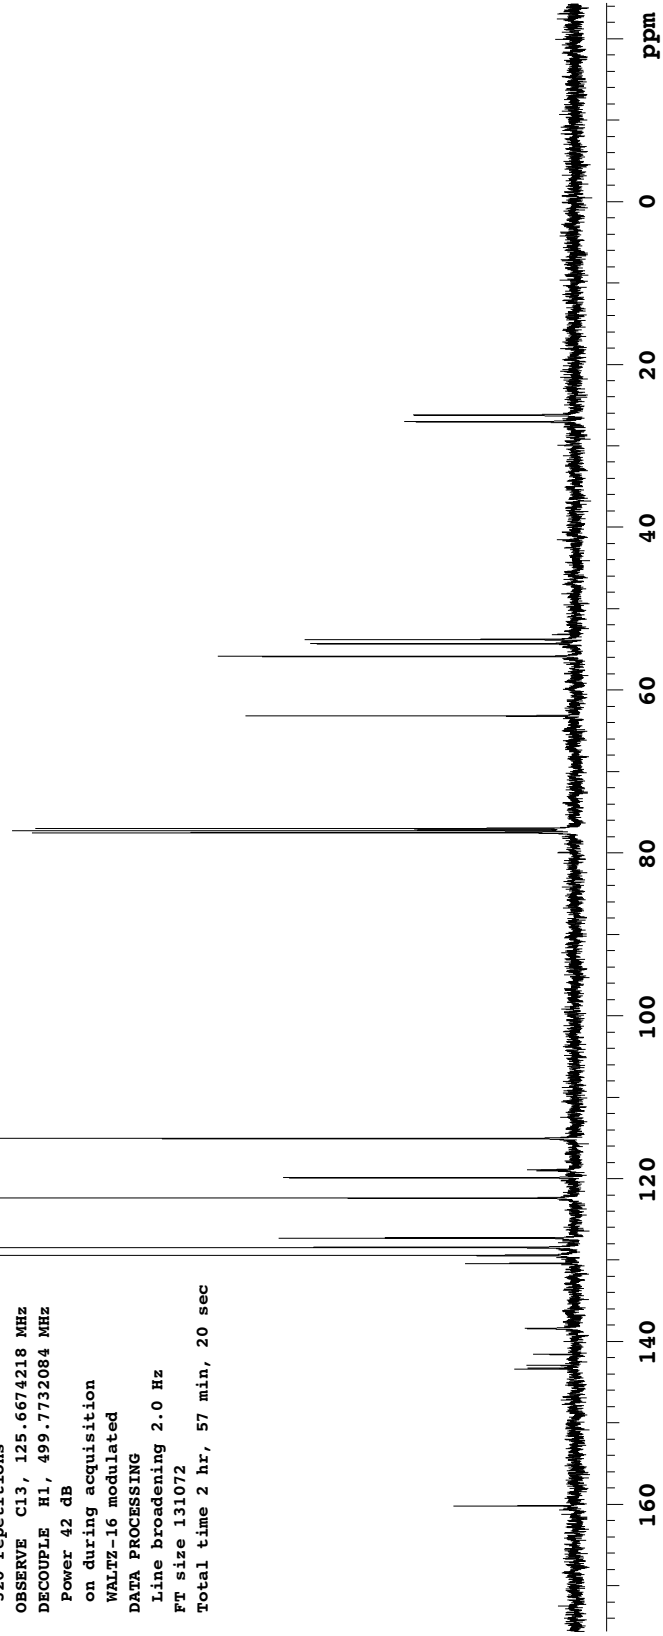

1231-RK-15-30-pure

Archive directory: /export/home/mkl/vnmrsys/data  
Sample directory: auto\_13Dec2004

Pulse Sequence: s2pul

Solvent: cdcl3  
Temp. 25.0 C / 298.1 K  
Operator: Barbara  
File: 1231-RK-15-30-pure  
INOVA-500 "riga"

Relax. delay 1.000 sec  
Pulse 45.0 degrees  
Acq. time 1.892 sec  
Width 7544.3 Hz  
20 repetitions

OBSERVE H1, 499.7707212 MHz  
DATA PROCESSING  
Line broadening 0.1 Hz  
FT size 32768  
Total time 9 min, 40 sec

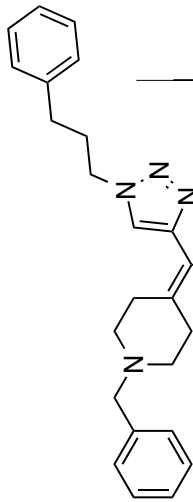

27: 500 MHz, CDCl<sub>3</sub>

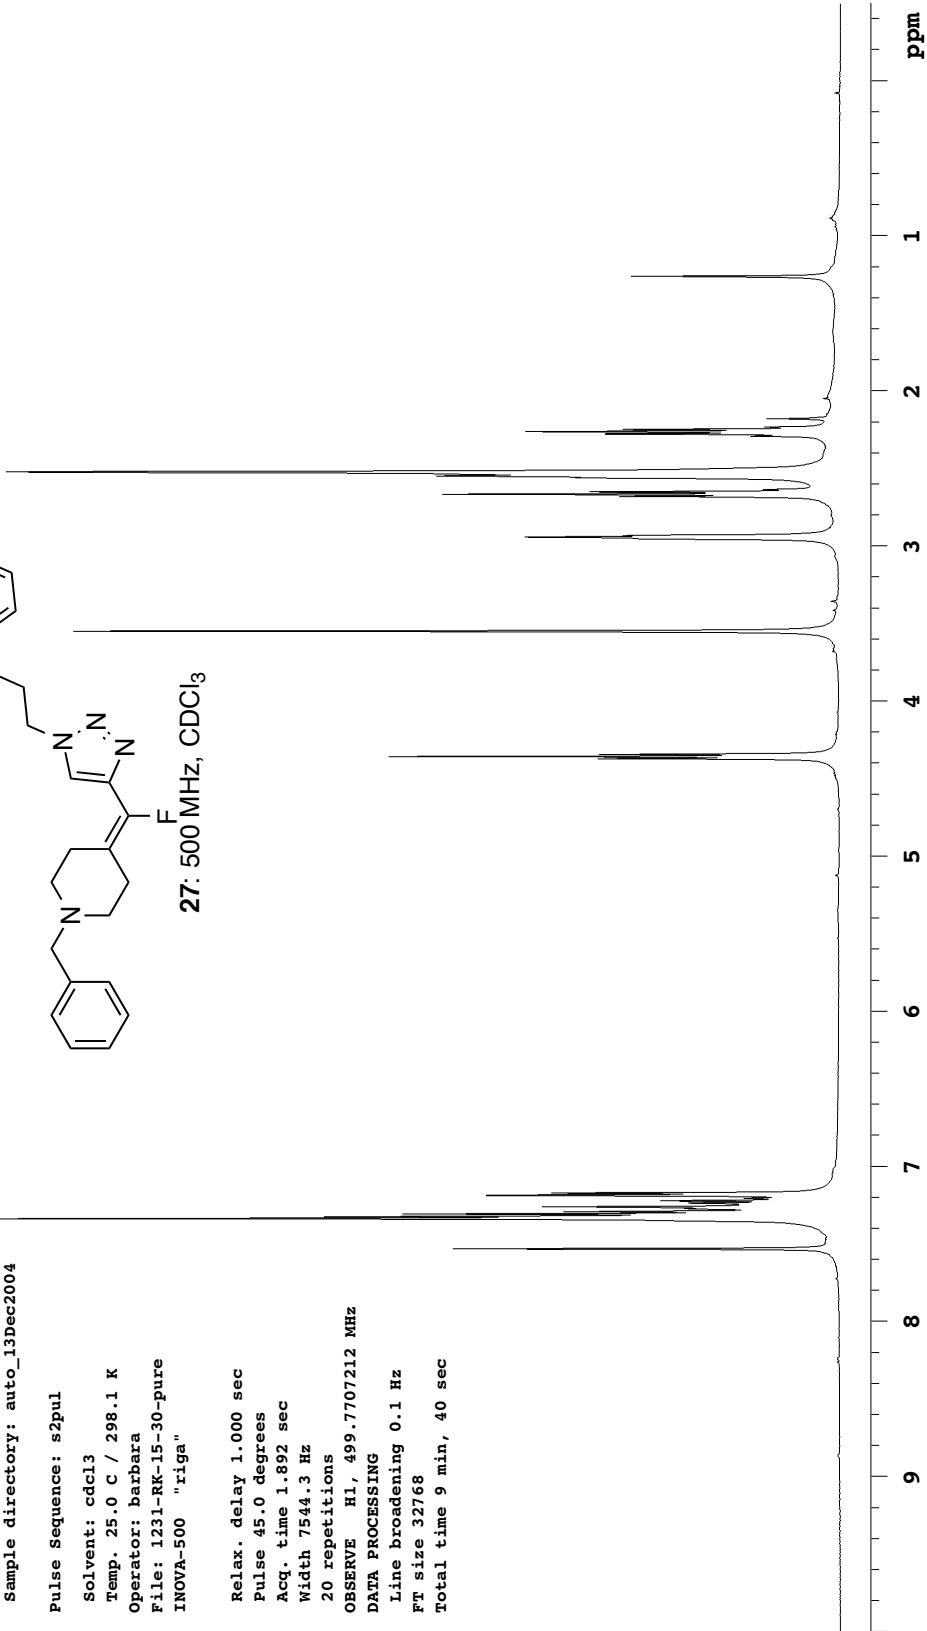



1231-Rk-15-30-13C

Pulse Sequence: s2pul

Solvent: cdcl3  
Temp. 25.0 C / 298.1 K  
Operator: barbara  
File: 1231-Rk-15-30-13C  
INOVA-500 "riga"

Relax. delay 4.000 sec  
Pulse 52.1 degrees  
Acq. time 1.300 sec  
Width 29996.3 Hz  
8472 repetitions  
OBSERVE C13, 125.6674095 MHz  
DECOUPLE H1, 499.7732084 MHz  
Power 42 dB  
on during acquisition  
WALTZ-16 modulated  
DATA PROCESSING  
Line broadening 3.0 Hz  
FT size 131072  
Total time 14 hr, 45 min, 15 sec

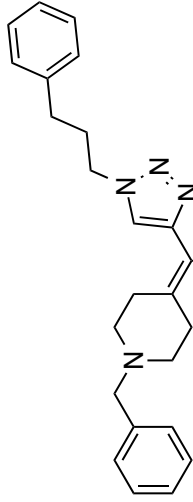

27: 125 MHz, CDCl<sub>3</sub>

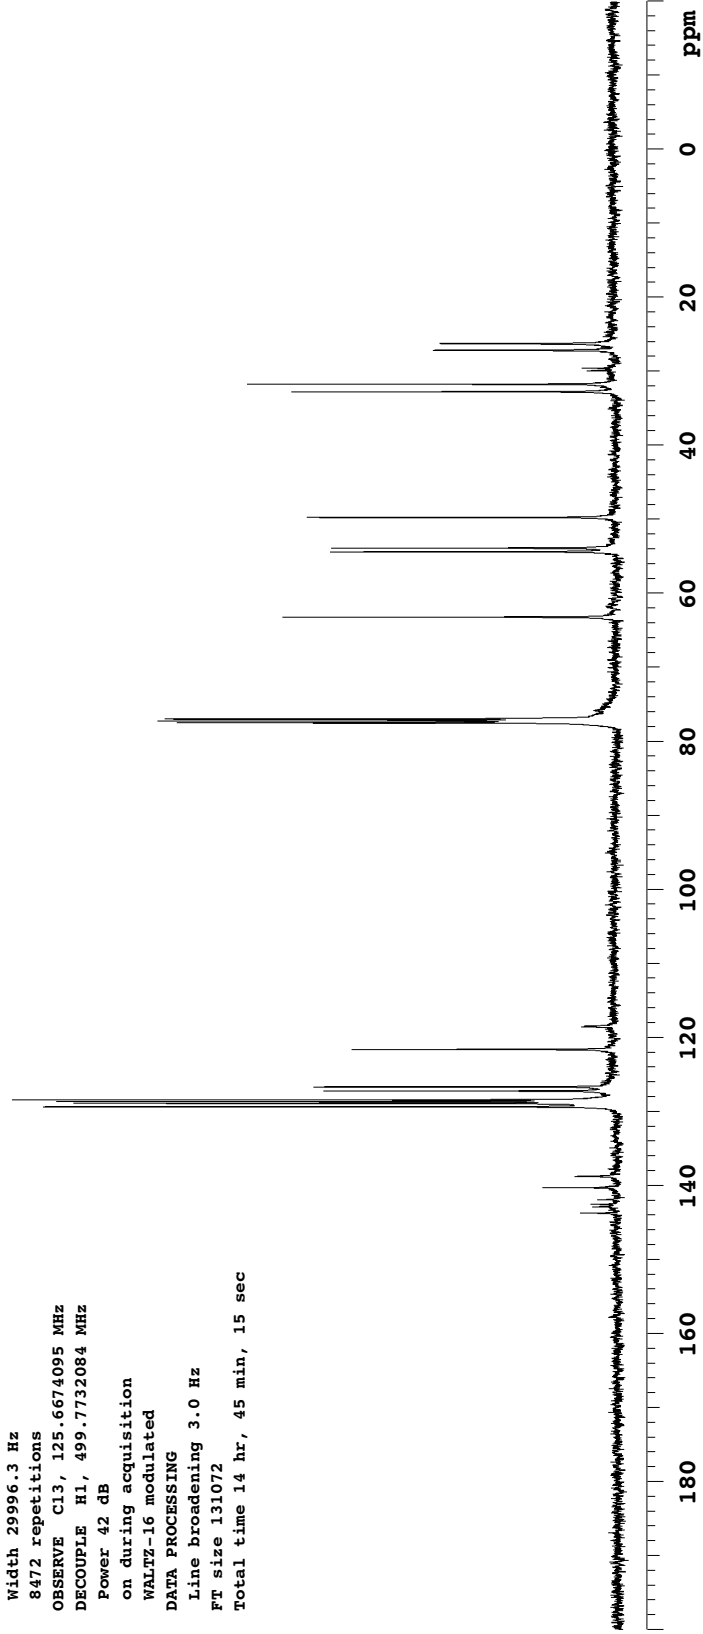

1222-RK-05-381-1

Archive directory: /export/home/mkl/vnmrSYS/data  
Sample directory: auto\_13Dec2004

Pulse Sequence: s2pul

Solvent: cdcl3  
Temp. 25.0 C / 298.1 K  
Operator: Barbara  
File: 1222-RK-05-381-pure  
INOVA-500 "riga"

Relax. delay 1.000 sec  
Pulse 45.0 degrees  
Acq. time 1.892 sec  
Width 7544.3 Hz  
16 repetitions  
OBSERVE H1, 499.7707184 MHz  
DATA PROCESSING  
FT size 32768  
Total time 9 min, 40 sec

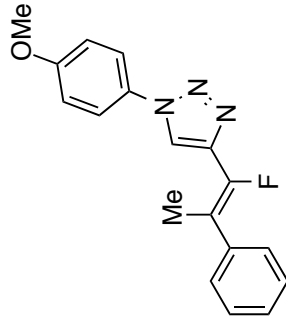

**28: Major isomer**  
500 MHz, CDCl<sub>3</sub>

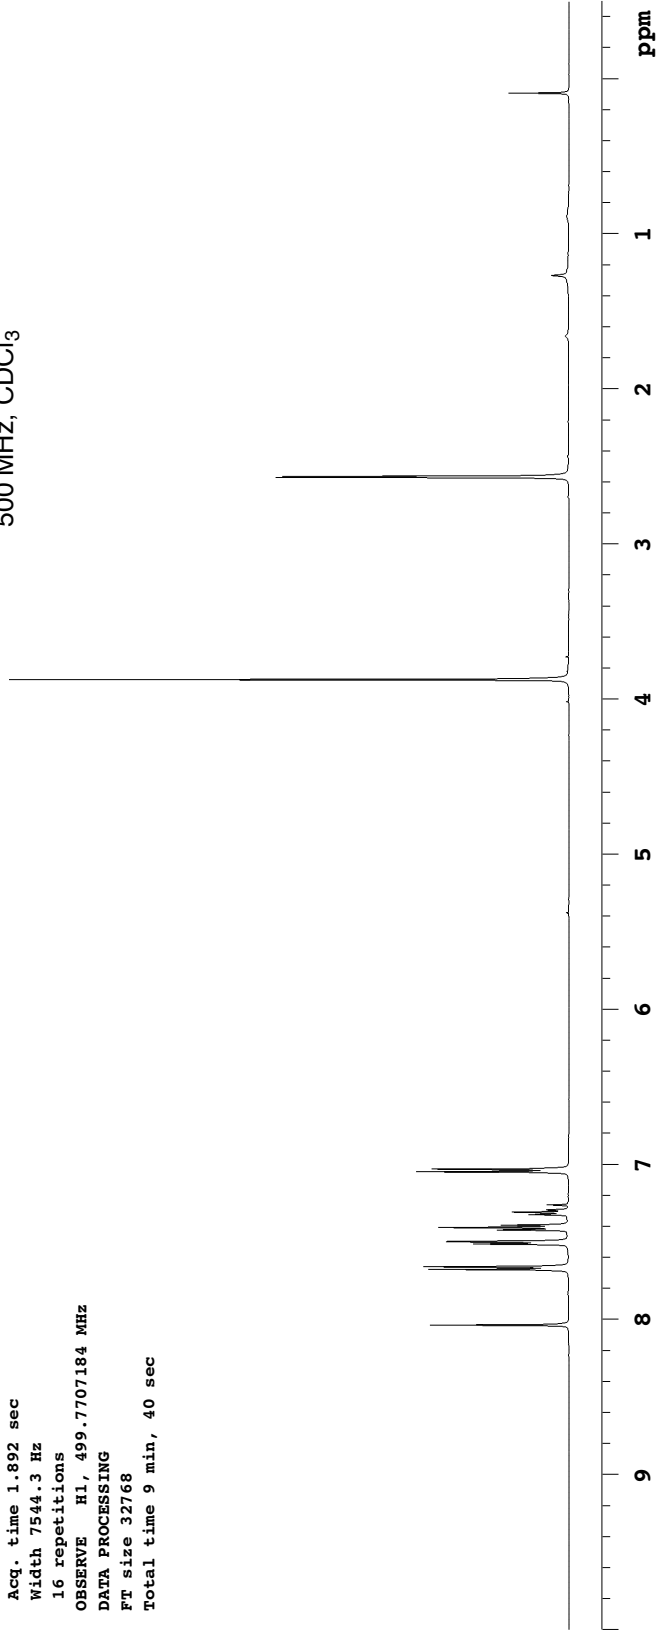

1222-RK-05-381-13C

Archive directory: /export/home/barbara/vnmrsys/data

Sample directory:

Pulse sequence: s2pul

Solvent: CDCl3

Temp. 25.0 C / 298.1 K

Operator: Barbara

File: 1222-RK-05-381-13C

INOVA-500 "riga"

Relax. delay 4.000 sec

Pulse 52.1 degrees

Acq. time 1.300 sec

Width 29996.3 Hz

176 repetitions

OBSERVE C13, 125.6674214 MHz

DECOUPLE H1, 499.7732084 MHz

Power 42 dB

on during acquisition

WALTZ-16 modulated

DATA PROCESSING

Line broadening 2.0 Hz

FT size 131072

Total time 2 hr, 57 min, 20 sec

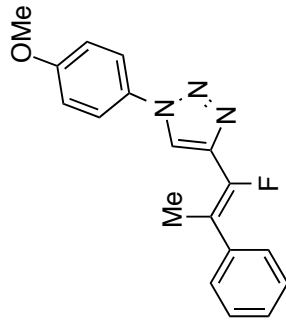

**28: Major isomer**  
125 MHz, CDCl<sub>3</sub>

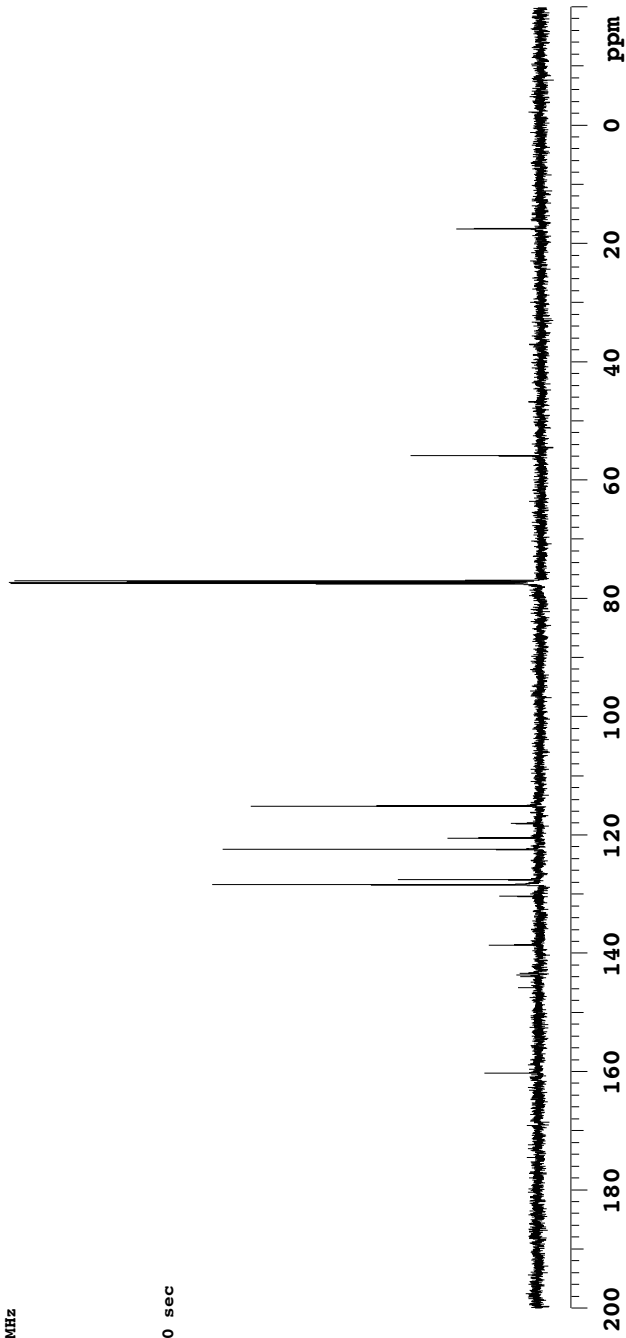

1222-RK-05-fraction2

Archive directory: /export/home/mkl/vnmrSYS/data  
Sample directory: auto\_13Dec2004

Pulse Sequence: s2pul

Solvent: cdcl3  
Temp. 25.0 C / 298.1 K  
Operator: Barbara  
File: 1222-RK-05-381-fraction2  
INOVA-500 "riga"

Relax. delay 1.000 sec  
Pulse 45.0 degrees  
Acq. time 1.892 sec  
Width 10000.0 Hz  
20 repetitions

OBSERVE H1, 499.7707212 MHz  
DATA PROCESSING  
Line broadening 0.1 Hz  
FT size 65536  
Total time 9 min, 40 sec

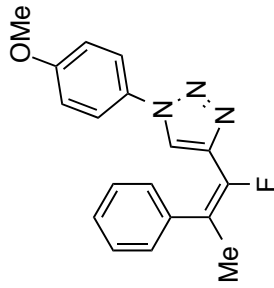

**28: Minor isomer**  
500 MHz, CDCl<sub>3</sub>

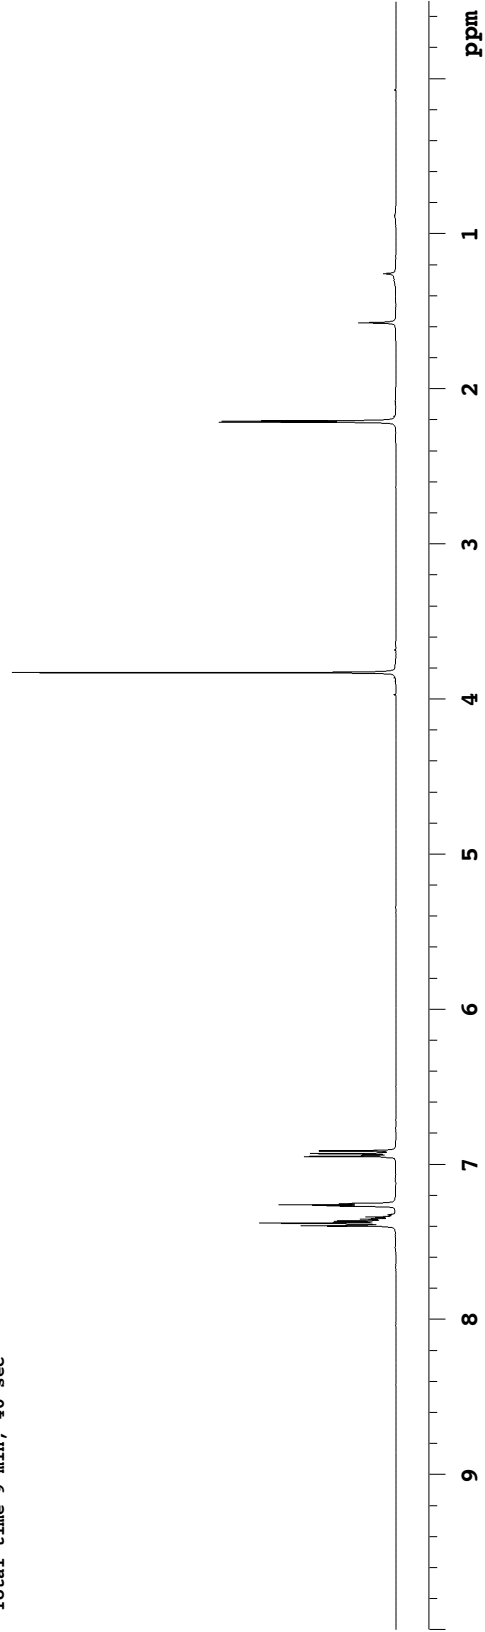

1231-RK-05-381-fraction2-13C

Pulse Sequence: s2pul

Solvent: cdcl3  
Temp. 25.0 C / 298.1 K  
Operator: Barbara  
File: 1231-RK-05-381-fraction2-13C  
INOVA-500 "riga"

Relax. delay 4.000 sec  
Pulse 52.1 degrees  
Acq. time 1.300 sec  
Width 29996.3 Hz  
10228 repetitions  
OBSERVE C13, 125.6674191 MHz  
DECOUPLE H1, 499.7732084 MHz  
Power 42 dB  
on during acquisition  
WALTZ-16 modulated  
DATA PROCESSING  
Line broadening 1.0 Hz  
FT size 131072  
Total time 29 hr, 30 min, 9 sec

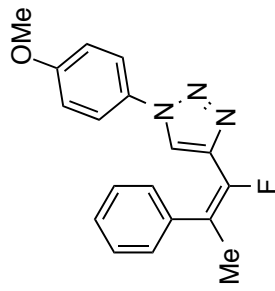

28: Minor isomer  
125 MHz, CDCl<sub>3</sub>

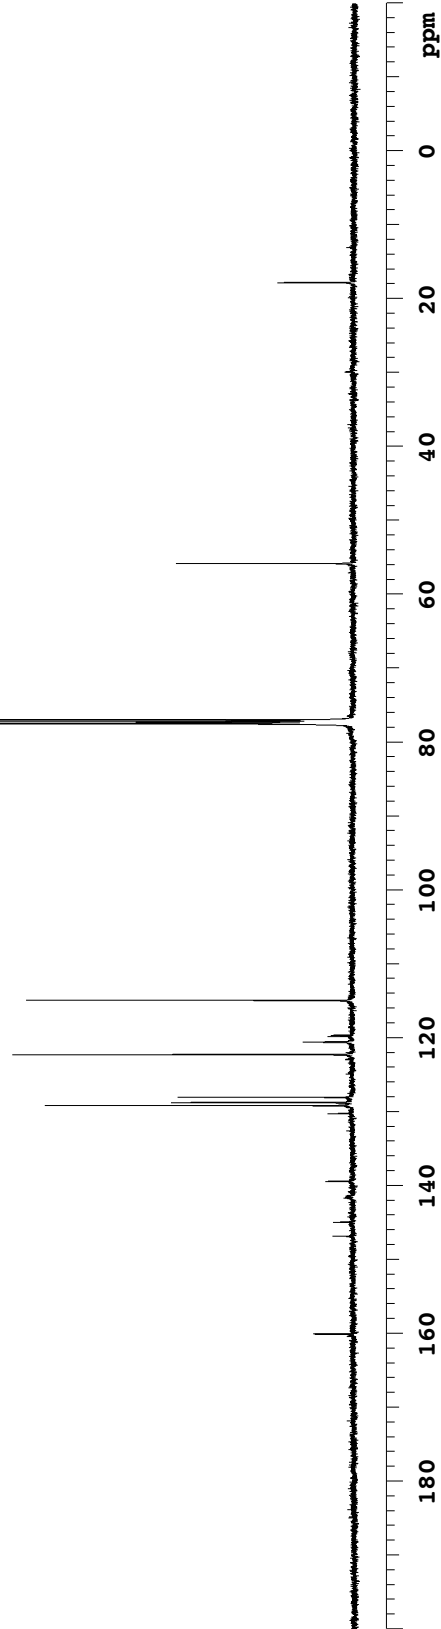

1231-RK-15-31-fraction1

Archive directory: /export/home/mkl/vnmrsys/data  
Sample directory: auto\_13Dec2004

Pulse Sequence: s2pul

Solvent: cdcl3  
Temp. 25.0 C / 298.1 K  
Operator: Barbara  
File: 1231-RK-15-31-fraction1  
INOVA-500 "riga"

Relax. delay 1.000 sec  
Pulse 45.0 degrees  
Acq. time 1.892 sec  
Width 7544.3 Hz  
32 repetitions  
OBSERVE H1, 499.7707226 MHz  
DATA PROCESSING  
Line broadening 0.1 Hz  
FT size 32768  
Total time 9 min, 40 sec

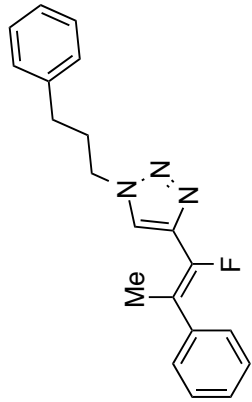

Z-29  
500 MHz, CDCl<sub>3</sub>

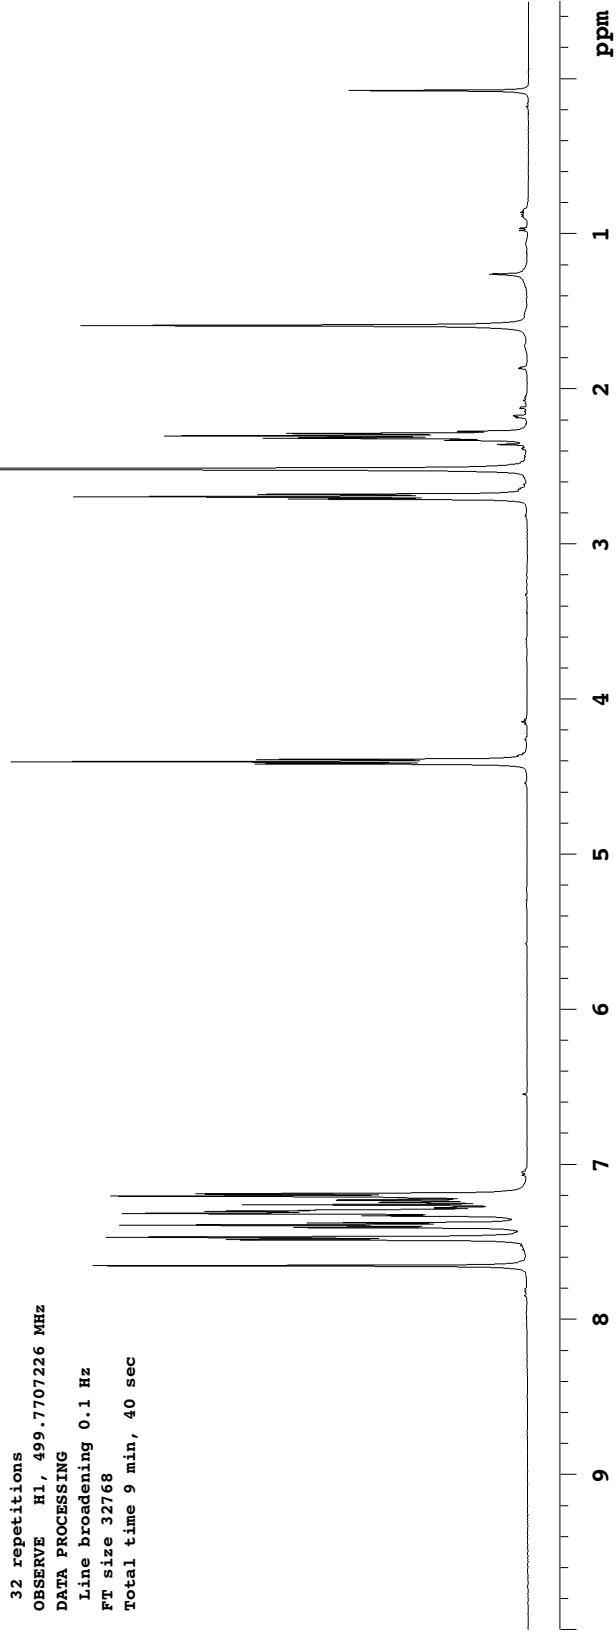

1231-RK-15-31-fraction1-13C

Archive directory: /export/home/barbara/vnmrSYS/data  
Sample directory:

Pulse Sequence: s2pul

Solvent: CDCl<sub>3</sub>  
Temp. 25.0 C / 298.1 K  
Operator: Barbara  
File: 1231-RK-15-31-fraction1-13C  
INOVA-500 "riga"

Relax. delay 4.000 sec  
Pulse 52.1 degrees  
Acq. time 1.300 sec  
Width 29996.3 Hz  
320 repetitions  
OBSERVE C13, 125.6674246 MHz  
DECOUPLE H1, 499.7732084 MHz  
Power 42 dB  
on during acquisition  
WALTZ-16 modulated  
DATA PROCESSING  
Line broadening 1.0 Hz  
FT size 131072  
Total time 2 hr, 57 min, 20 sec

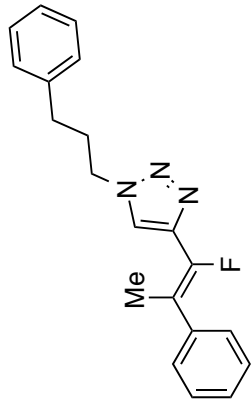

Z-29  
125 MHz, CDCl<sub>3</sub>

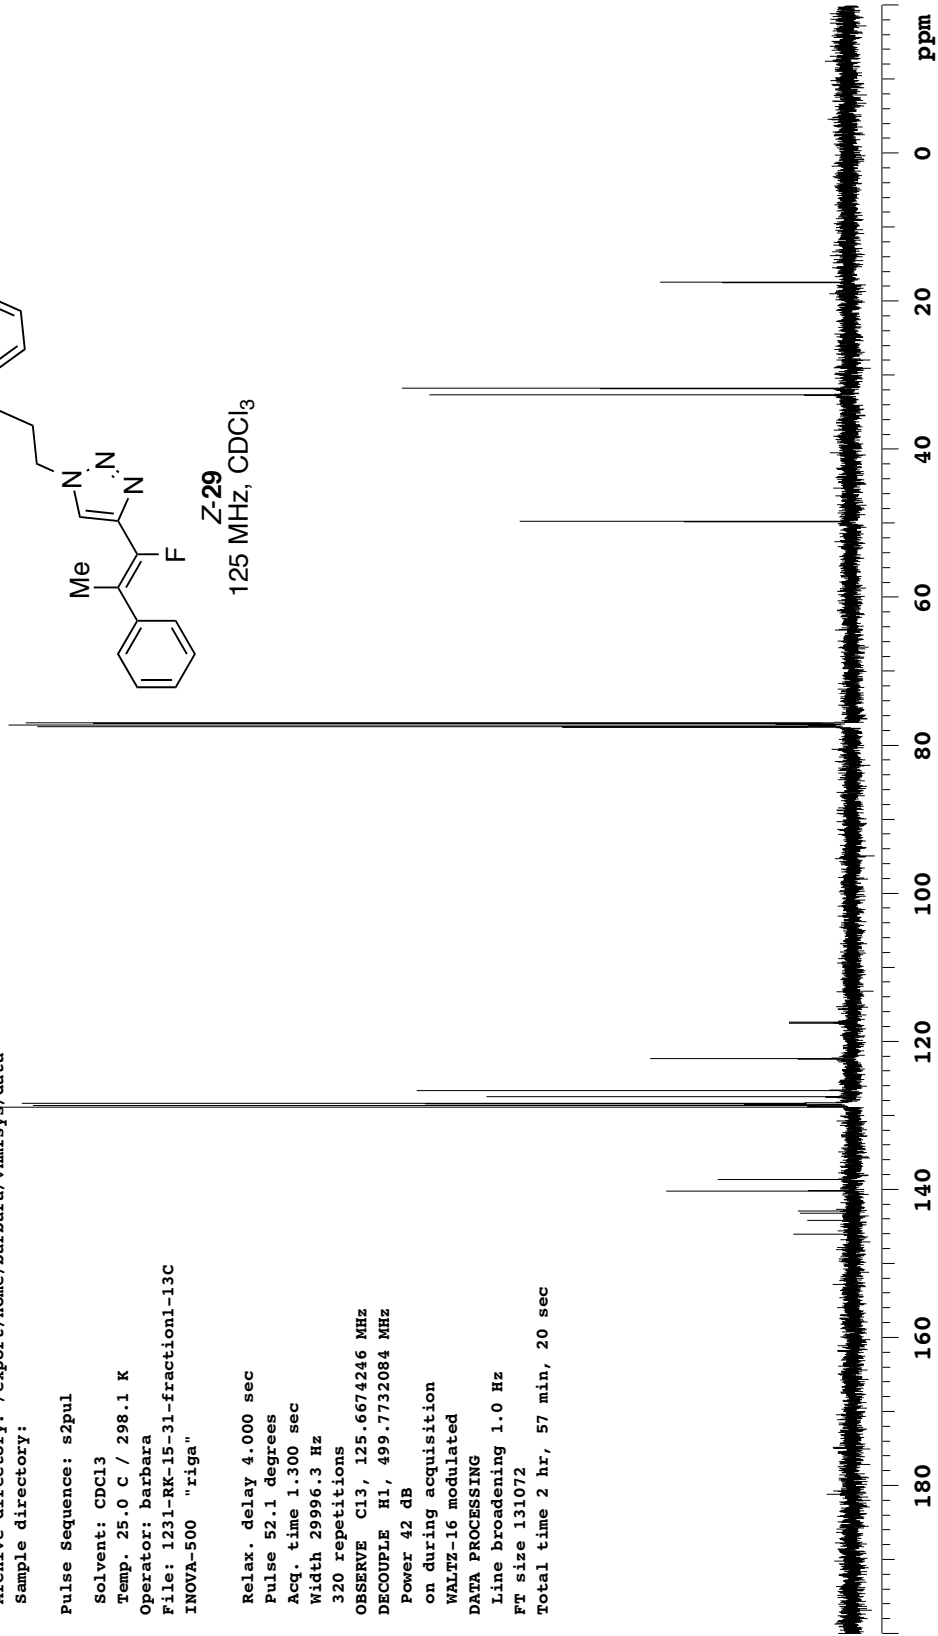

1231-RK-15-31-fraction2

Archive directory: /export/home/mkl/vnmrSYS/data  
Sample directory: auto\_13Dec2004

Pulse Sequence: s2pul

Solvent: cdcl3  
Temp. 25.0 C / 298.1 K  
Operator: Barbara  
File: 1231-RK-15-31-fraction2  
INOVA-500 "riga"

Relax. delay 1.000 sec  
Pulse 45.0 degrees  
Acq. time 1.892 sec  
Width 7544.3 Hz  
76 repetitions  
OBSERVE H1, 499.7707221 MHz  
DATA PROCESSING  
Line broadening 0.1 Hz  
FT size 32768  
Total time 9 min, 40 sec

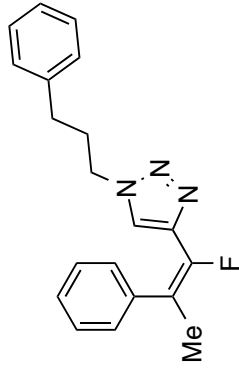

*E*-29  
500 MHz, CDCl<sub>3</sub>

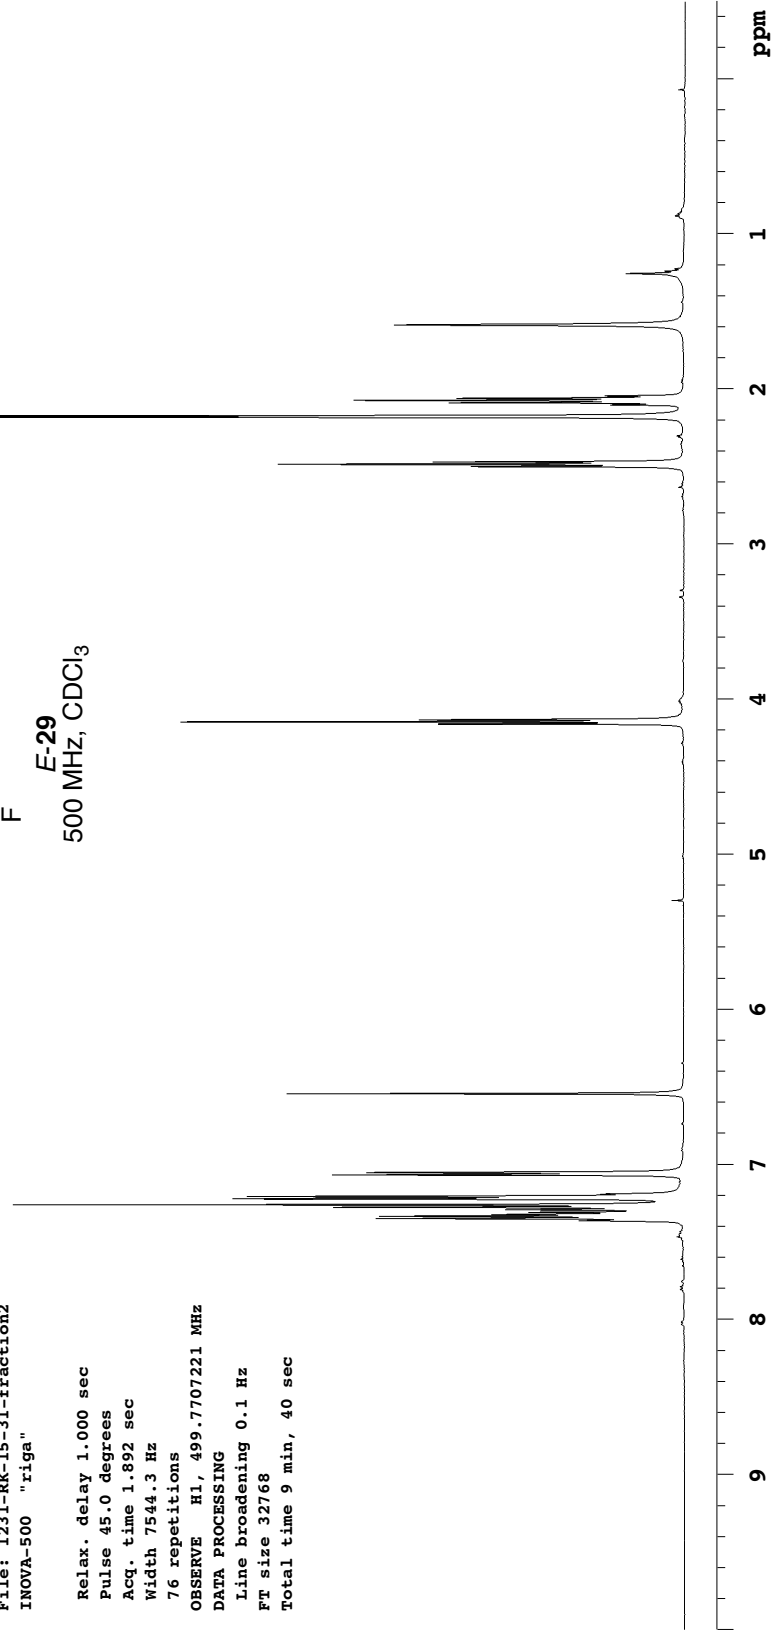



1231-RK-15-31-fraction2-13C

Pulse Sequence: s2pul

Solvent: cdcl3  
Temp. 25.0 C / 298.1 K  
Operator: barbara  
File: 1231-RK-15-31-fraction2-13C  
INOVA-500 "riga"

Relax. delay 4.000 sec  
Pulse 52.1 degrees  
Acq. time 1.300 sec  
Width 29996.3 Hz  
10000 repetitions  
OBSERVE CH3, 125.6674177 MHz  
DECOUPLE H1, 499.7732084 MHz  
Power 42 dB  
on during acquisition  
WALTZ-16 modulated  
DATA PROCESSING  
Line broadening 1.0 Hz  
FT size 131072  
Total time 14 hr, 45 min, 15 sec

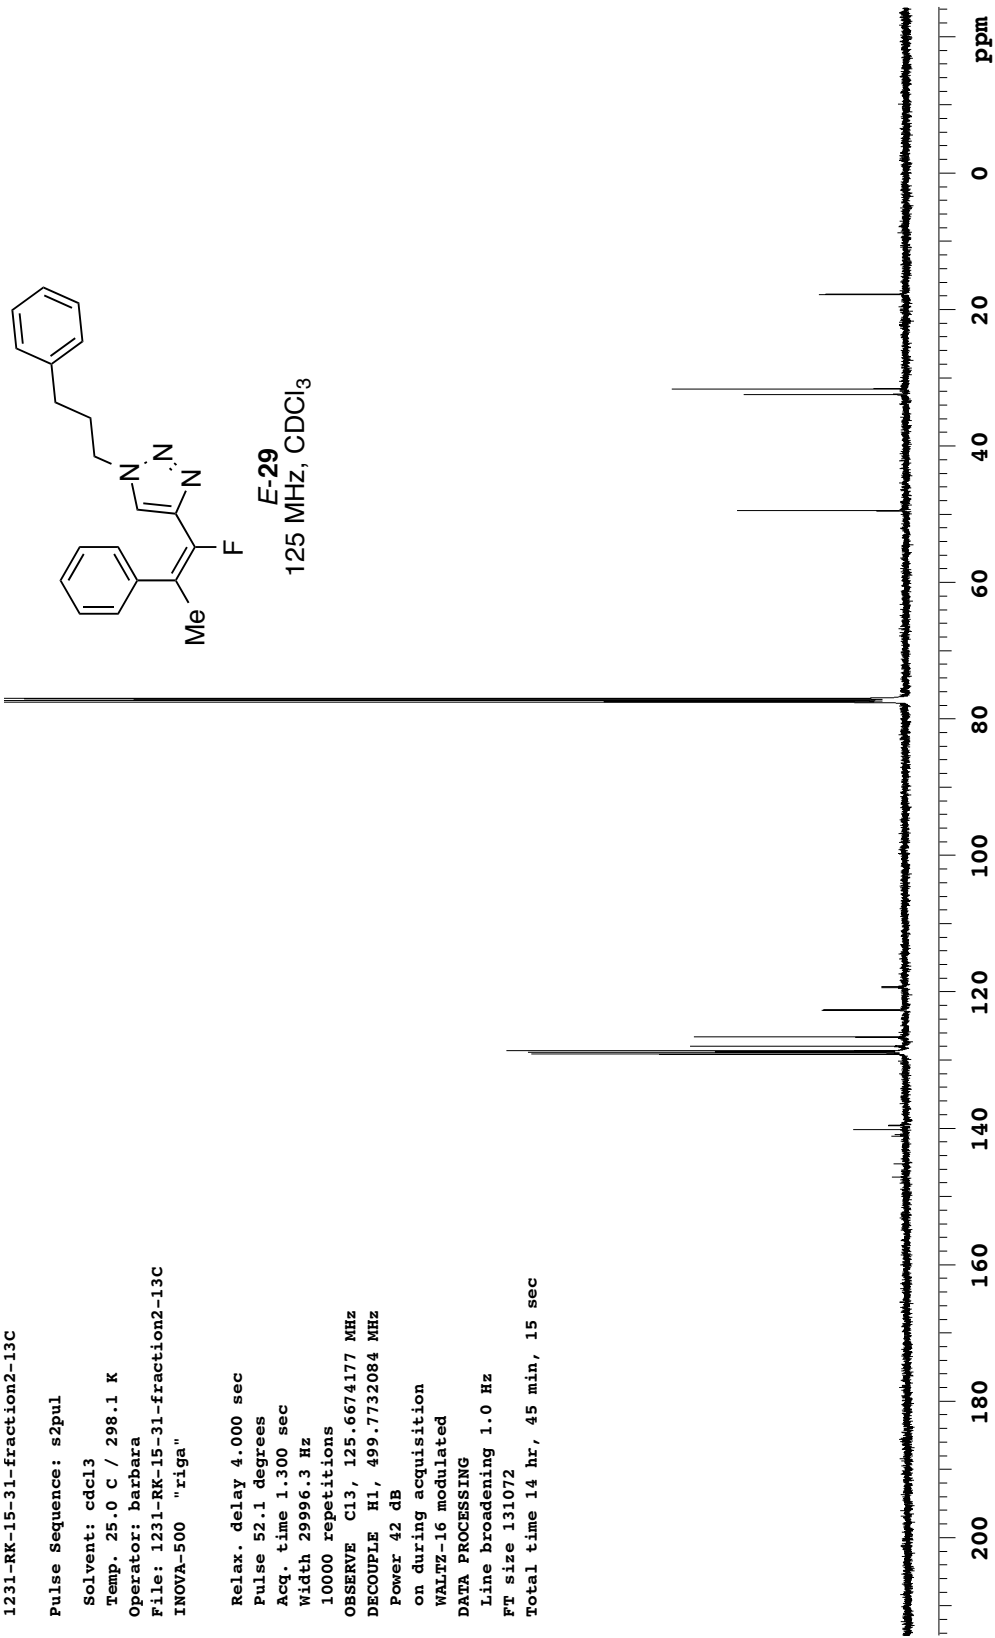

GS-1231-03-209-pure1

Pulse Sequence: s2pul

Solvent: CDCl3

Temp. 25.0 C / 298.1 K

Operator: barbara

File: GS-1231-03-209-pure1

INOVA-500 "r1ga"

Pulse 57.9 degrees

Acq. time 1.892 sec

Width 8000.0 Hz

60 repetitions

OBSERVE H1, 499.7707217 MHz

DATA PROCESSING

Line broadening 0.1 Hz

FT size 32768

Total time 3 min, 10 sec

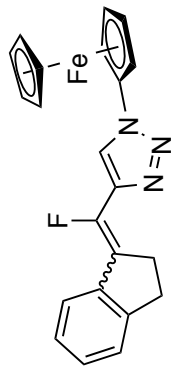

30

500 MHz, CDCl<sub>3</sub>

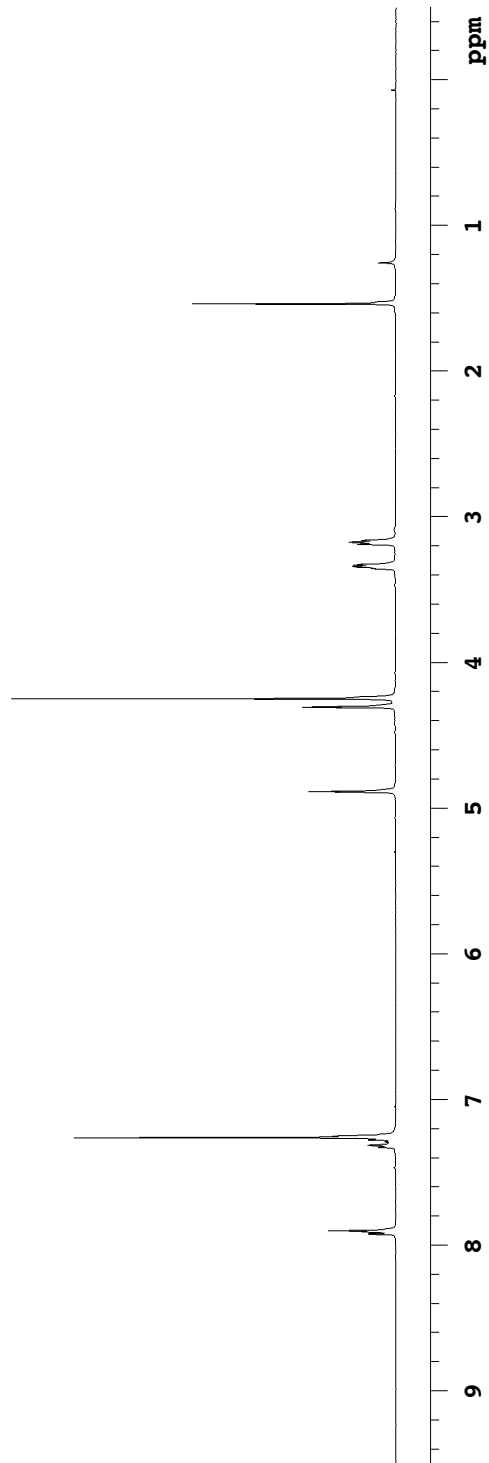

GS-1231-03-209-pure-c13-cdcl3

Pulse Sequence: s2pul

Solvent: cdcl3

Temp. 25.0 C / 298.1 K

Operator: barbara

File: GS-1231-03-209-pure-c13-cdcl3

INOVA-500 "riga"

Relax. delay 2.500 sec

Pulse 52.1 degrees

Acq. time 1.300 sec

Width 29996.3 Hz

15188 repetitions

OBSERVE C13, 125.6674223 MHz

DECOUPLE H1, 499.7732084 MHz

Power 42 dB

on during acquisition

WALTZ-16 modulated

DATA PROCESSING

Line broadening 2.0 Hz

FT size 131072

Total time 17 hr, 59 min, 35 sec

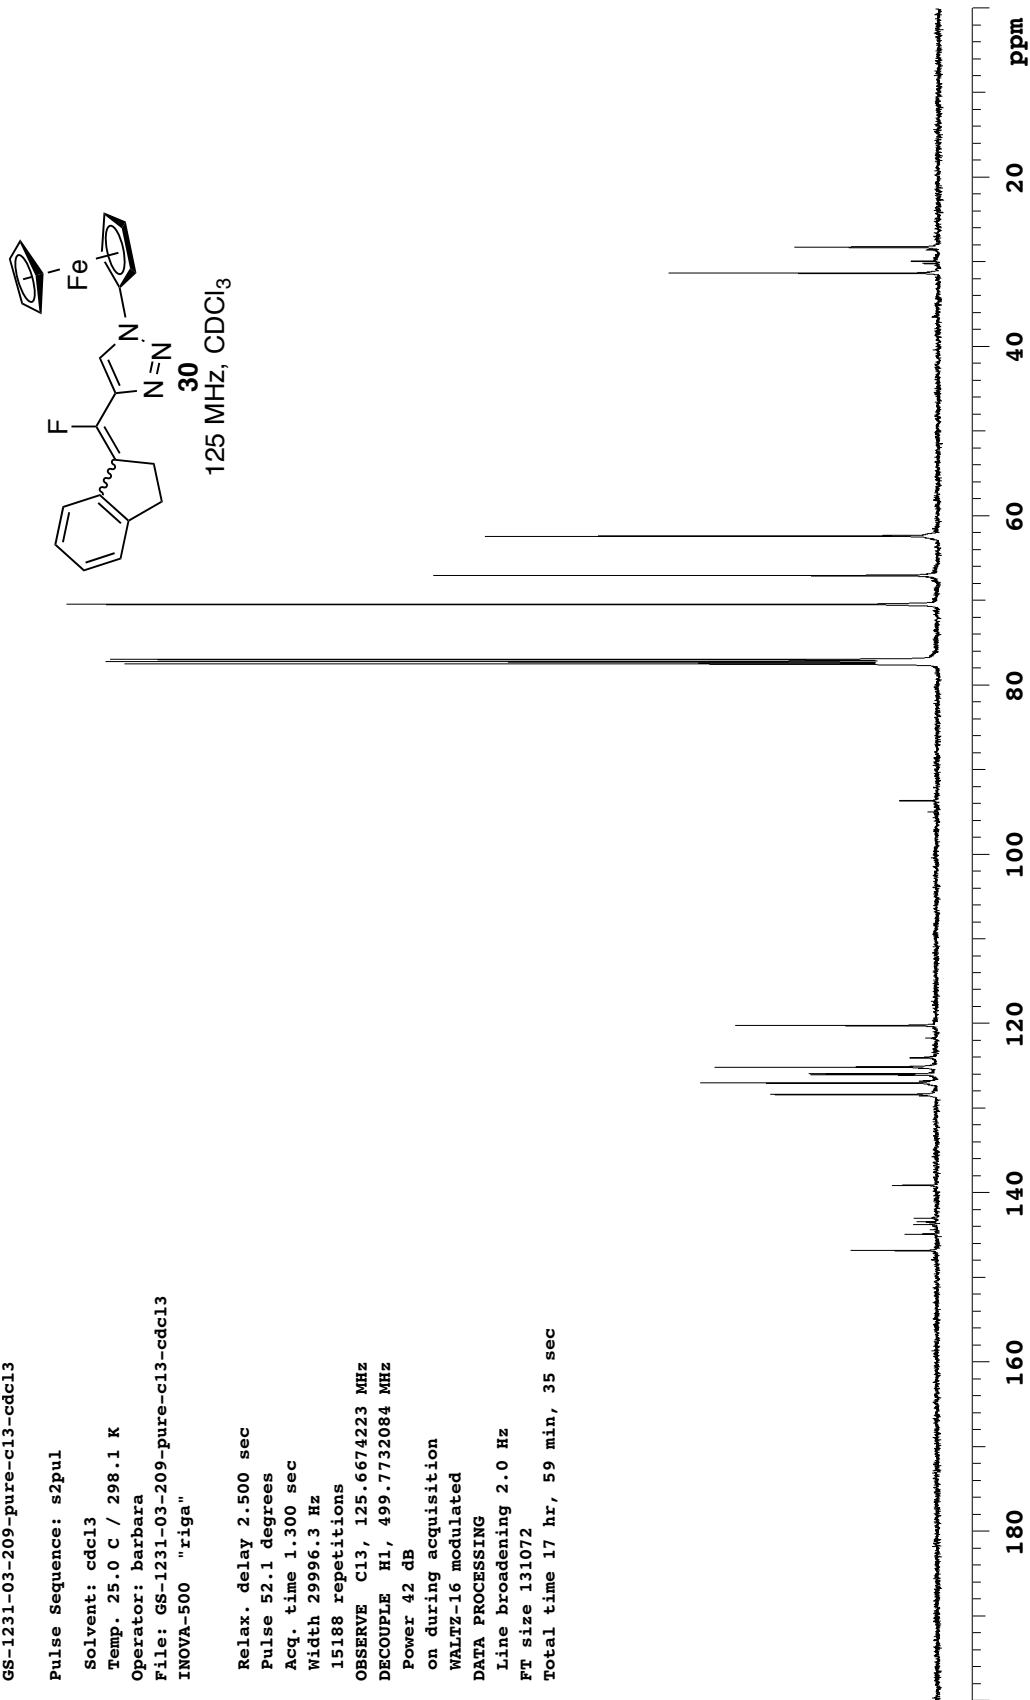

Supplement: NIHMS779409-supplement-SI_Rev.pdf [file NIHMS779409-supplement-SI_Rev.pdf]
